# Supplementary material for: Ambra1 modulates the tumor immune microenvironment and response to PD-1 blockade in melanoma
Source: HighWire-hosted journal article supplement (doi:10.1136/jitc-2022-006389), 2023-03-01
Supplement: jitc-2022-006389supp004_data_supplement.xlsx [file jitc-2022-006389supp004_data_supplement.xlsx]

## Sheet: Raw data_ImmunologyPanel
Probe Name	Class Name	BX0177_002	BX0177_003	BX0177_007	BX0177_012	BX0177_013	BX0177_014	BX0177_015	BX0177_009	BX0177_010	BX0177_011	BX0177_020	BX0177_021	BX0177_022	BX0177_023	BX0177_024
		WT	WT	WT	WT	WT	WT	WT	KO	KO	KO	KO	KO	KO	KO	KO
Abcb10	Endogenous	109.49	96.9	119.61	100.64	120.3	92.04	88.5	114.35	136.78	122.08	103.82	132.12	102.62	146.85	115.86
Abcb1a	Endogenous	26.59	32.3	20.52	22.26	54.89	20.56	47.73	31.54	55.07	24.19	28.12	29.36	25.65	41.26	34.76
Abcf1	Endogenous	253.38	180.44	219.88	259.34	230.08	233.05	243.63	291.78	355.29	260.29	297.39	278.93	280.43	235.45	260.69
Abl1	Endogenous	205.68	105.82	137.79	143.22	182.2	127.29	187.94	260.24	351.73	300.6	240.08	321.5	247.7	245.15	241.38
Adal	Endogenous	84.46	55.69	48.67	61.93	67.74	63.65	60.66	74.92	101.26	90.98	71.37	124.78	76.96	105.59	77.24
Ahr	Endogenous	458.28	642.69	518.91	477.07	411.11	346.63	481.28	371.63	497.4	397.34	452.04	515.28	235.32	474.53	382.35
Aicda	Endogenous	4.69	8.91	5.86	8.71	8.18	3.92	3.98	8.87	12.43	5.76	8.65	10.28	7.96	3.64	1.93
Aire	Endogenous	13.29	17.82	15.24	15.48	18.69	4.9	22.87	13.8	33.75	9.21	18.38	17.62	7.08	19.42	13.52
App	Endogenous	3667.83	3299.2	3332.15	3145.96	3286.57	2563.51	4005.4	4330.38	5760.96	5183.82	3023.7	3579.08	2453.13	3241.63	2954.49
Arhgdib	Endogenous	1395.96	1109.39	1277.04	1512.5	1393.35	996.81	1678.53	749.17	977.04	951.31	738.62	769.25	796.18	796.15	946.21
Atg16l1	Endogenous	182.22	204.95	138.96	145.15	122.63	126.32	162.09	140.96	159.88	191.18	259.54	330.31	268.93	264.57	233.66
Atm	Endogenous	37.54	46.78	40.46	41.61	44.38	46.02	33.81	37.46	58.62	47.22	36.77	66.06	39.81	50.97	52.14
B2m	Endogenous	11799.6	10516.9	13469.9	15992	13092.5	13041.8	21756.2	9952.09	9919.57	8606.69	11075	7899.51	6545.52	10274.7	12254.4
Batf	Endogenous	32.06	40.1	19.35	35.8	30.37	25.46	42.76	21.69	33.75	16.12	37.85	44.04	37.16	25.49	30.9
Batf3	Endogenous	30.5	20.05	9.38	20.32	19.85	28.4	25.85	17.74	37.3	44.92	43.26	45.51	43.35	30.34	44.41
Bax	Endogenous	236.96	133.66	133.1	160.64	202.05	153.73	268.48	233.62	275.35	301.75	240.08	314.16	279.55	273.07	280
Bcap31	Endogenous	1086.27	679.44	832.6	871.89	958.87	948.83	1017.26	974.9	989.47	864.93	816.48	794.21	711.26	793.72	836.14
Bcl2	Endogenous	89.15	140.34	103.78	64.84	72.41	54.83	77.56	118.29	170.54	143.96	144.91	212.87	105.27	142	139.04
Bcl3	Endogenous	90.72	80.2	79.74	67.74	53.73	27.42	140.21	65.06	60.4	93.29	77.86	120.38	77.85	97.09	98.48
Bcl6	Endogenous	138.42	121.41	88.54	142.25	96.94	109.67	90.49	74.92	81.72	70.25	111.39	117.44	58.39	98.3	90.76
Bid	Endogenous	69.6	74.63	62.15	54.19	47.89	56.79	93.47	48.3	55.07	49.52	60.56	80.74	47.77	63.11	56
Blnk	Endogenous	117.31	64.6	136.62	203.21	114.46	202.69	136.23	84.77	72.83	79.47	131.94	82.21	99.08	69.18	98.48
Bst1	Endogenous	42.23	46.78	28.14	52.26	53.73	44.06	65.63	42.39	39.08	25.34	40.01	39.64	47.77	21.85	32.83
Bst2	Endogenous	316.73	507.91	309	403.53	399.43	282.99	524.04	408.1	509.83	431.89	418.52	391.97	443.21	601.96	548.42
Btk	Endogenous	66.47	108.04	53.36	48.38	70.08	49.94	39.78	35.49	69.28	71.41	58.4	91.02	59.27	60.68	77.24
Btla	Endogenous	66.47	112.5	50.42	38.71	57.23	30.35	71.6	33.52	46.19	38.01	31.36	38.17	31.85	38.84	44.41
Btnl1	Endogenous	16.42	22.28	7.04	22.26	21.02	15.67	13.92	13.8	31.98	16.12	18.38	22.02	16.81	16.99	15.45
Btnl2	Endogenous	10.95	15.59	7.04	12.58	23.36	14.69	17.9	12.81	23.09	21.88	15.14	17.62	9.73	8.5	17.38
C1qa	Endogenous	1397.53	682.79	679.56	1166.06	918	646.26	1262.87	1232.18	1245.28	1557.11	1096.58	1177.37	1307.51	940.57	1044.69
C1qb	Endogenous	1655.6	835.38	771.03	1404.12	1209.98	899.87	1931.1	1380.04	1444.24	1926.8	1225.27	1209.66	1357.05	1071.64	1278.35
C1qbp	Endogenous	554.48	553.58	612.13	604.81	619.01	702.08	587.68	497.8	481.41	472.2	520.17	455.09	545.83	540.07	511.73
C1ra	Endogenous	420.74	387.62	341.83	325.14	358.56	245.78	572.77	434.71	630.63	424.98	227.1	262.78	318.47	262.15	191.17
C1s	Endogenous	987.73	1226.34	1037.81	593.19	576.96	384.82	1528.38	925.62	1582.8	1035.38	631.56	989.46	757.26	820.42	716.42
C2	Endogenous	179.87	116.95	168.86	159.67	212.56	187.02	368.92	194.19	286	162.39	277.93	117.44	141.54	294.91	278.07
C3	Endogenous	140.77	120.3	103.78	274.82	277.97	423.99	239.65	292.77	92.37	93.29	186.01	284.8	154.81	70.39	88.83
C4a	Endogenous	1266.92	1867.92	1298.15	1263.8	998.58	730.47	2398.46	2056.27	2732.15	3058.93	1478.32	3628.99	1119.08	2921.23	2682.22
C4bp	Endogenous	4.69	8.91	5.28	8.71	19.85	4.9	11.93	7.89	15.99	10.37	11.9	19.08	11.5	9.71	21.24
C6	Endogenous	46.92	34.53	18.18	73.54	56.06	40.15	55.69	34.5	51.52	38.01	31.36	49.91	38.92	21.85	27.03
C7	Endogenous	118.87	34.53	8.8	23.22	198.55	15.67	18.89	26.62	30.2	38.01	9.73	79.27	26.54	15.78	32.83
C8a	Endogenous	7.82	10.02	4.69	6.77	9.34	5.88	6.96	7.89	17.76	10.37	10.81	8.81	5.31	15.78	9.66
C8b	Endogenous	24.24	30.07	11.73	9.68	23.36	14.69	14.92	17.74	26.65	23.03	20.55	20.55	20.35	19.42	25.1
C8g	Endogenous	17.99	12.25	8.8	11.61	16.35	10.77	13.92	13.8	30.2	19.58	22.71	19.08	15.04	12.14	13.52
C9	Endogenous	8.6	17.82	7.62	5.81	14.02	7.83	7.96	10.84	14.21	13.82	15.14	7.34	7.08	7.28	7.72
Camp	Endogenous	4.69	7.8	3.52	6.77	12.85	9.79	6.96	8.87	7.11	9.21	1.08	10.28	7.96	7.28	11.59
Card9	Endogenous	46.14	50.12	21.69	47.42	47.89	39.17	45.74	43.37	56.85	46.07	62.72	64.59	37.16	29.13	32.83
Casp1	Endogenous	167.36	219.43	199.94	208.05	198.55	158.63	261.52	157.72	120.8	103.65	209.8	173.23	147.74	250.01	262.62
Casp2	Endogenous	135.3	83.54	109.06	94.83	103.95	112.61	97.45	141.95	161.65	170.45	137.34	167.36	156.58	129.86	148.69
Casp3	Endogenous	211.94	211.63	275.58	217.73	241.76	197.8	273.46	316.42	349.96	327.08	226.02	322.97	225.59	285.2	285.79
Casp8	Endogenous	180.65	299.62	204.04	178.05	155.34	129.25	181.97	161.66	216.72	207.31	230.35	252.5	193.74	208.75	229.79
Ccbp2	Endogenous	21.12	23.39	13.49	27.1	26.86	14.69	13.92	16.76	14.21	16.12	20.55	23.49	14.15	12.14	15.45
Ccl11	Endogenous	814.12	2024.97	986.8	462.56	1118.88	243.82	1436.89	981.8	2467.46	2273.47	968.97	3397.04	541.41	1889.63	1917.53
Ccl12	Endogenous	122.78	125.86	59.81	110.32	64.24	35.25	247.6	88.72	97.7	124.38	93	95.42	170.74	212.39	202.76
Ccl19	Endogenous	160.32	203.83	134.86	109.35	200.88	294.74	101.43	77.87	26.65	58.74	77.86	64.59	169.85	57.04	52.14
Ccl2	Endogenous	474.71	351.97	237.47	227.41	263.95	177.23	902.9	351.91	421.01	595.43	572.08	679.7	454.71	912.66	625.66
Ccl20	Endogenous	57.09	71.29	55.7	70.64	60.73	77.36	47.73	23.66	33.75	16.12	48.66	20.55	31.85	32.77	50.21
Ccl22	Endogenous	275.28	112.5	152.45	247.73	286.14	127.29	141.2	63.09	31.98	71.41	137.34	38.17	69.89	72.82	106.21
Ccl24	Endogenous	79.77	41.21	49.25	114.19	54.89	45.04	137.23	64.07	51.52	84.07	87.6	73.4	51.31	46.12	108.14
Ccl25	Endogenous	40.67	38.98	23.45	23.22	26.86	29.38	35.8	29.57	49.74	46.07	46.5	77.81	55.73	57.04	63.72
Ccl26	Endogenous	8.6	4.46	3.52	12.58	10.51	4.9	5.97	3.94	7.11	6.91	5.41	7.34	6.19	8.5	7.72
Ccl3	Endogenous	55.53	42.33	22.28	25.16	42.05	28.4	59.66	22.67	60.4	38.01	63.8	60.19	94.66	69.18	96.55
Ccl4	Endogenous	13.29	10.02	7.62	14.52	10.51	4.9	11.93	8.87	23.09	8.06	10.81	17.62	7.08	13.35	21.24
Ccl5	Endogenous	39.1	24.5	27.56	35.8	35.04	25.46	115.35	16.76	28.42	29.94	25.95	30.83	16.81	33.98	34.76
Ccl6	Endogenous	204.12	183.78	104.95	188.7	123.8	74.42	379.86	144.9	106.59	176.21	231.43	211.4	162.78	161.41	148.69
Ccl7	Endogenous	68.04	110.27	39.87	86.12	49.05	53.86	156.12	76.89	49.74	81.77	85.43	73.4	64.58	103.16	77.24
Ccl8	Endogenous	2938.95	3270.24	1671.64	2657.27	2081.26	1332.67	3407.77	1111.92	607.54	1289.91	810	760.44	2040.88	909.01	1523.59
Ccl9	Endogenous	840.71	637.12	430.37	608.68	760.33	449.45	930.75	510.62	437	805.04	868.39	1441.61	828.92	654.15	772.42
Ccr10	Endogenous	14.86	26.73	8.8	20.32	40.88	21.54	19.89	23.66	19.54	31.1	24.87	29.36	21.23	27.91	25.1
Ccr2	Endogenous	380.86	521.28	268.54	335.79	433.3	254.59	373.89	327.27	275.35	460.68	387.15	490.32	444.09	365.3	467.31
Ccr3	Endogenous	31.28	30.07	15.24	14.52	26.86	9.79	45.74	21.69	53.29	85.23	30.28	86.61	19.46	63.11	112
Ccr4	Endogenous	25.81	49.01	29.32	48.38	22.19	37.21	22.87	12.81	24.87	14.97	33.52	11.74	18.58	16.99	23.17
Ccr5	Endogenous	98.54	105.82	53.36	75.48	94.6	41.13	134.24	79.85	108.36	92.14	94.08	88.08	103.5	108.01	104.28
Ccr6	Endogenous	20.33	25.62	12.9	13.55	17.52	13.71	9.94	4.93	8.88	10.37	19.47	11.74	12.39	9.71	28.97
Ccr7	Endogenous	26.59	44.55	18.18	29.03	42.05	17.63	44.75	11.83	30.2	19.58	17.3	30.83	9.73	13.35	25.1
Ccr8	Endogenous	10.95	17.82	12.9	3.87	14.02	10.77	17.9	2.96	15.99	10.37	4.33	8.81	3.54	18.2	23.17
Ccr9	Endogenous	14.08	22.28	13.49	19.35	22.19	19.58	16.9	9.86	14.21	18.43	21.63	8.81	17.69	12.14	21.24
Ccrl1	Endogenous	147.81	101.36	41.63	242.89	171.69	282.99	52.7	36.47	14.21	21.88	67.05	39.64	61.93	15.78	15.45
Ccrl2	Endogenous	19.55	23.39	12.9	9.68	16.35	7.83	29.83	25.63	42.63	32.25	28.12	41.11	8.85	31.55	21.24
Cd109	Endogenous	624.86	755.19	740.54	681.25	661.05	657.03	528.02	512.59	371.27	459.53	500.7	343.52	323.78	419.92	444.14
Cd14	Endogenous	101.67	82.42	60.39	74.51	98.11	73.44	136.23	78.86	120.8	117.47	75.7	82.21	84.93	77.67	98.48
Cd160	Endogenous	10.17	8.91	5.28	7.74	12.85	5.88	10.94	9.86	14.21	10.37	12.98	10.28	6.19	10.92	15.45
Cd163	Endogenous	281.54	138.12	79.74	209.99	216.07	205.63	82.53	122.23	83.49	108.26	122.2	145.34	167.2	47.33	113.93
Cd164	Endogenous	1333.4	1401.21	1108.17	1245.42	1357.14	1312.11	1250.94	1197.68	1110.27	1105.64	939.77	1007.07	1164.2	910.23	1048.56
Cd19	Endogenous	13.29	18.94	8.21	6.77	15.18	11.75	13.92	15.77	21.32	9.21	17.3	24.96	16.81	8.5	15.45
Cd1d1	Endogenous	85.24	63.49	53.36	94.83	95.77	100.86	73.58	64.07	58.62	51.83	91.92	80.74	78.73	60.68	83.03
Cd2	Endogenous	42.23	80.2	45.15	56.13	50.22	60.71	110.38	35.49	21.32	26.49	47.58	38.17	42.46	26.7	28.97
Cd209g	Endogenous	279.19	210.52	90.88	243.86	127.3	263.4	172.03	149.83	115.47	109.41	186.01	208.46	297.24	92.24	121.66
Cd22	Endogenous	17.21	32.3	14.66	23.22	16.35	9.79	34.8	5.91	35.53	25.34	27.04	46.98	22.12	20.63	32.83
Cd226	Endogenous	50.83	57.92	26.39	41.61	53.73	26.44	61.65	36.47	60.4	26.49	44.34	26.42	45.12	35.2	54.07
Cd244	Endogenous	46.14	70.17	35.18	38.71	71.24	44.06	35.8	19.71	19.54	43.76	60.56	39.64	41.58	30.34	42.48
Cd247	Endogenous	46.92	62.38	32.83	71.61	78.25	60.71	63.64	52.24	60.4	48.37	52.99	60.19	46.89	67.96	56
Cd24a	Endogenous	463.76	320.79	600.41	652.22	246.43	237.94	709	122.23	159.88	200.4	269.28	322.97	148.62	271.85	308.97
Cd27	Endogenous	17.21	22.28	15.83	18.39	19.85	15.67	28.84	15.77	26.65	12.67	29.2	17.62	17.69	20.63	28.97
Cd274	Endogenous	42.23	37.87	34.01	38.71	28.03	39.17	92.48	23.66	23.09	27.64	75.7	67.53	22.12	82.53	48.28
Cd28	Endogenous	15.64	28.96	12.9	14.52	15.18	15.67	13.92	13.8	31.98	28.79	9.73	26.42	7.96	20.63	36.69
Cd34	Endogenous	995.55	363.11	501.9	500.29	1199.47	897.91	1414.02	990.67	1023.22	1097.57	691.04	1007.07	583.87	850.76	785.93
Cd36	Endogenous	377.73	74.63	91.47	353.21	476.52	507.22	207.83	271.08	195.41	228.04	216.29	154.14	235.32	165.05	224
Cd3d	Endogenous	58.65	102.47	47.49	66.77	74.75	50.92	82.53	28.59	49.74	35.7	67.05	42.57	40.69	54.61	67.59
Cd3e	Endogenous	44.58	41.21	28.73	41.61	35.04	47.98	49.72	3.94	14.21	27.64	30.28	5.87	17.69	13.35	27.03
Cd3eap	Endogenous	107.14	135.89	125.48	109.35	107.45	103.79	73.58	85.76	131.46	90.98	115.71	123.32	115	81.31	121.66
Cd4	Endogenous	28.15	37.87	21.69	43.55	31.53	18.6	56.68	25.63	51.52	28.79	31.36	33.76	30.96	32.77	48.28
Cd40	Endogenous	36.76	49.01	24.04	38.71	39.71	29.38	41.76	28.59	33.75	35.7	46.5	42.57	22.12	46.12	46.35
Cd40lg	Endogenous	17.99	16.71	15.24	10.64	18.69	13.71	17.9	11.83	24.87	11.52	18.38	19.08	14.15	30.34	19.31
Cd44	Endogenous	1171.51	2703.3	1926.7	1420.57	1184.29	1212.23	1424.96	1105.02	815.38	1178.19	1383.16	710.53	841.3	824.06	1177.94
Cd46	Endogenous	9.38	18.94	10.55	8.71	18.69	11.75	11.93	13.8	31.98	19.58	11.9	23.49	23.89	13.35	40.55
Cd48	Endogenous	170.49	279.57	147.76	201.28	220.74	176.25	163.08	140.96	181.2	206.16	145.99	248.1	195.51	144.42	164.14
Cd5	Endogenous	33.63	33.42	33.42	27.1	43.21	29.38	42.76	18.73	37.3	31.1	30.28	38.17	23.89	38.84	27.03
Cd53	Endogenous	26.59	22.28	9.38	10.64	19.85	15.67	20.88	22.67	30.2	17.28	18.38	23.49	22.12	25.49	25.1
Cd55	Endogenous	68.82	37.87	31.08	72.58	105.11	129.25	65.63	59.14	44.41	36.85	52.99	86.61	86.7	33.98	38.62
Cd59b	Endogenous	7.82	15.59	9.38	6.77	12.85	8.81	10.94	17.74	23.09	11.52	20.55	39.64	22.12	29.13	25.1
Cd6	Endogenous	16.42	25.62	11.14	17.42	19.85	8.81	16.9	11.83	10.66	13.82	16.22	20.55	14.15	13.35	27.03
Cd69	Endogenous	7.04	13.37	3.52	6.77	10.51	8.81	8.95	3.94	17.76	10.37	5.41	11.74	5.31	12.14	17.38
Cd7	Endogenous	28.94	40.1	23.45	34.84	28.03	47.98	31.82	4.93	17.76	17.28	30.28	11.74	15.92	14.56	15.45
Cd74	Endogenous	6696.71	4346.22	4435.04	7145.41	8184.89	4968.39	7691.59	4296.87	3066.11	4792.24	4227.33	3075.54	3547.44	2703.98	2881.12
Cd79a	Endogenous	11.73	10.02	8.21	11.61	12.85	4.9	10.94	2.96	12.43	14.97	20.55	11.74	12.39	8.5	19.31
Cd79b	Endogenous	19.55	16.71	18.76	25.16	33.87	18.6	30.83	13.8	47.96	38.01	29.2	38.17	25.65	29.13	36.69
Cd80	Endogenous	40.67	35.64	20.52	28.06	43.21	12.73	51.71	23.66	24.87	34.55	38.93	63.13	31.85	26.7	40.55
Cd81	Endogenous	4427.2	3658.98	3450	2902.1	3063.49	1765.47	4671.64	5236.28	8073.87	7281.08	3276.75	5682.77	3444.82	4639.74	4489.67
Cd82	Endogenous	355.83	202.72	261.51	434.49	398.27	651.16	391.79	335.15	230.94	187.73	375.26	157.08	302.55	209.96	162.21
Cd83	Endogenous	132.95	220.54	117.27	96.77	98.11	67.56	99.44	89.7	95.93	123.23	117.88	99.83	107.04	117.72	171.86
Cd86	Endogenous	82.9	103.59	50.42	66.77	63.07	59.73	59.66	43.37	51.52	46.07	64.89	71.93	67.23	57.04	61.79
Cd8a	Endogenous	11.73	21.16	10.55	18.39	29.2	12.73	22.87	14.79	33.75	25.34	18.38	16.15	9.73	15.78	28.97
Cd8b1	Endogenous	5.47	6.68	6.45	7.74	18.69	9.79	9.94	10.84	15.99	14.97	8.65	23.49	16.81	13.35	23.17
Cd9	Endogenous	5136.52	3180.02	3838.15	4373.95	3952.29	4643.3	7082.03	3418.57	2769.45	2668.5	2590.04	1912.85	2084.23	2724.62	3508.7
Cd96	Endogenous	9.38	11.14	8.8	2.9	15.18	9.79	9.94	12.81	10.66	16.12	8.65	13.21	3.54	9.71	11.59
Cd97	Endogenous	450.46	651.6	386.4	265.15	463.67	211.5	397.76	478.09	600.43	798.13	419.6	549.05	274.24	493.95	500.14
Cd99	Endogenous	702.28	677.22	875.99	629	719.45	407.34	407.7	1056.72	1477.99	1200.08	964.64	1037.9	759.91	949.06	747.31
Cdh5	Endogenous	201.77	114.73	123.72	125.8	212.56	94.98	194.9	219.82	337.52	295.99	107.06	187.91	138.01	121.36	142.9
Cdkn1a	Endogenous	1512.49	1249.73	1141.01	1230.9	1268.38	1414.93	1391.15	1265.7	1440.68	1924.5	1113.88	1397.57	1145.62	1401.75	965.52
Ceacam1	Endogenous	112.62	104.7	66.84	44.51	87.6	39.17	77.56	65.06	81.72	94.44	77.86	248.1	45.12	169.91	115.86
Cebpb	Endogenous	739.04	290.71	764	949.3	671.56	802.93	750.76	481.04	246.92	366.24	591.55	290.67	495.4	322.83	368.83
Cfb	Endogenous	202.55	87.99	92.05	179.02	115.63	123.38	248.6	129.13	124.35	135.9	108.14	130.66	163.66	94.66	84.97
Cfd	Endogenous	1353.73	265.09	149.52	2176.33	2298.5	2811.25	616.52	1062.63	266.46	416.92	367.69	243.69	737.8	123.79	305.1
Cfh	Endogenous	510.68	897.76	388.15	370.62	432.14	249.69	835.29	499.77	993.02	685.26	367.69	726.68	556.44	540.07	602.49
Cfi	Endogenous	7.04	15.59	2.93	9.68	5.84	1.96	9.94	6.9	15.99	6.91	9.73	17.62	4.42	8.5	9.66
Cfp	Endogenous	312.82	179.33	128.41	381.27	239.43	225.21	290.36	281.92	193.63	291.38	290.91	274.52	299.9	134.71	135.17
Chuk	Endogenous	262.77	471.16	243.92	205.15	224.24	184.09	225.73	259.25	344.63	270.65	309.29	468.3	340.59	432.05	349.52
Ciita	Endogenous	96.19	126.98	83.26	83.22	112.12	53.86	79.55	33.52	31.98	67.95	52.99	64.59	73.43	57.04	44.41
Cish	Endogenous	40.67	47.9	48.67	50.32	29.2	50.92	44.75	28.59	39.08	21.88	45.42	35.23	38.04	30.34	28.97
Clec4a4	Endogenous	6.26	4.46	3.52	8.71	9.34	11.75	2.98	4.93	15.99	5.76	7.57	13.21	6.19	8.5	7.72
Clec4e	Endogenous	8.6	22.28	12.9	9.68	12.85	5.88	40.77	11.83	17.76	12.67	10.81	20.55	7.08	16.99	13.52
Clec5a	Endogenous	39.1	34.53	34.01	30.97	32.7	16.65	60.66	19.71	46.19	46.07	31.36	26.42	40.69	27.91	63.72
Clu	Endogenous	492.69	329.7	810.32	967.69	569.95	639.41	636.41	546.1	140.34	122.08	583.98	164.42	438.79	410.21	519.45
Cmklr1	Endogenous	380.86	294.05	261.51	315.47	235.92	209.55	229.7	345.01	220.28	315.57	297.39	204.06	278.66	254.86	287.73
Cr2	Endogenous	7.82	11.14	7.04	4.84	9.34	7.83	3.98	1.97	8.88	11.52	10.81	8.81	7.08	3.64	15.45
Cradd	Endogenous	57.87	56.81	48.08	55.16	50.22	51.9	91.48	69	92.37	67.95	67.05	126.25	69	112.87	98.48
Crlf2	Endogenous	186.13	89.11	145.41	153.86	150.66	73.44	263.51	155.75	218.5	194.64	205.47	146.8	158.35	186.9	200.83
Csf1	Endogenous	387.12	100.25	144.24	294.18	342.21	228.15	304.28	323.32	284.23	384.67	294.15	292.14	283.97	262.15	252.97
Csf1r	Endogenous	898.58	717.32	497.21	717.06	630.69	500.36	682.15	811.27	984.14	1099.88	713.75	823.57	802.38	594.68	614.07
Csf2	Endogenous	6.26	8.91	5.86	5.81	7.01	10.77	6.96	7.89	14.21	9.21	9.73	14.68	11.5	8.5	15.45
Csf2rb	Endogenous	96.19	258.41	87.36	93.87	99.27	79.31	113.36	71.96	95.93	120.93	110.31	145.34	97.31	109.23	117.79
Csf3r	Endogenous	39.1	65.72	24.04	39.68	32.7	30.35	51.71	33.52	47.96	51.83	29.2	46.98	46.89	44.9	56
Ctla4	Endogenous	27.37	51.24	19.94	18.39	15.18	14.69	37.79	7.89	5.33	12.67	25.95	16.15	17.69	14.56	23.17
Ctnnb1	Endogenous	2506.48	2151.95	2498.96	2418.25	2826.4	3098.15	2899.64	3403.78	3678.98	3197.13	3414.09	4301.35	2834.41	4681	4920.3
Ctsc	Endogenous	606.09	537.99	496.04	570.94	464.84	408.32	605.58	437.67	376.6	489.47	469.34	444.82	576.79	436.91	621.8
Ctsg	Endogenous	10.95	13.37	7.62	7.74	10.51	11.75	4.97	9.86	10.66	2.3	12.98	10.28	6.19	12.14	17.38
Ctss	Endogenous	995.55	1241.94	718.85	1122.52	972.89	811.75	2547.62	991.66	669.71	928.27	860.82	571.07	571.48	949.06	1154.76
Cul9	Endogenous	61.78	61.26	37.53	38.71	56.06	44.06	59.66	73.93	85.27	76.01	87.6	157.08	81.39	120.15	75.31
Cx3cl1	Endogenous	67.26	37.87	40.46	60	67.74	55.81	70.6	79.85	92.37	155.48	50.83	80.74	66.35	59.47	52.14
Cx3cr1	Endogenous	172.05	162.62	122.54	90.96	119.13	55.81	303.29	254.32	445.88	435.34	165.46	465.37	191.97	341.03	278.07
Cxcl1	Endogenous	30.5	17.82	11.14	16.45	9.34	7.83	60.66	9.86	31.98	11.52	19.47	22.02	13.27	38.84	34.76
Cxcl10	Endogenous	25.81	69.06	41.63	59.03	35.04	55.81	125.29	47.32	44.41	51.83	18.38	39.64	32.73	50.97	65.66
Cxcl11	Endogenous	8.6	11.14	4.1	16.45	5.84	4.9	10.94	18.73	14.21	18.43	11.9	17.62	12.39	12.14	17.38
Cxcl12	Endogenous	909.53	367.57	458.51	787.7	597.98	784.33	919.81	1094.18	1200.87	871.84	666.16	578.41	837.76	665.07	681.66
Cxcl13	Endogenous	15.64	13.37	12.9	23.22	19.85	33.29	79.55	33.52	15.99	18.43	19.47	48.45	30.08	23.06	3.86
Cxcl15	Endogenous	7.04	18.94	3.52	13.55	10.51	6.85	6.96	13.8	10.66	13.82	7.57	4.4	6.19	6.07	15.45
Cxcl3	Endogenous	21.12	24.5	11.73	21.29	10.51	12.73	19.89	11.83	10.66	9.21	11.9	10.28	5.31	7.28	30.9
Cxcl9	Endogenous	28.15	81.31	41.04	60	36.21	38.19	173.02	55.2	65.73	31.1	45.42	36.7	55.73	185.69	61.79
Cxcr1	Endogenous	5.47	7.8	8.21	9.68	11.68	9.79	8.95	5.91	10.66	6.91	9.73	7.34	3.54	10.92	15.45
Cxcr2	Endogenous	48.49	23.39	52.77	53.22	38.54	9.79	67.62	9.86	8.88	9.21	28.12	19.08	29.19	19.42	30.9
Cxcr3	Endogenous	40.67	34.53	25.8	44.51	57.23	41.13	52.7	36.47	63.95	49.52	52.99	58.72	41.58	36.41	69.52
Cxcr4	Endogenous	106.36	96.9	121.96	86.12	149.5	91.06	132.25	126.18	120.8	65.65	94.08	93.95	77.85	120.15	81.1
Cxcr5	Endogenous	10.17	11.14	6.45	11.61	16.35	11.75	7.96	8.87	24.87	19.58	5.41	11.74	2.65	4.85	5.79
Cxcr6	Endogenous	45.36	76.86	76.22	60.96	29.2	42.11	103.42	19.71	26.65	33.4	46.5	27.89	24.77	41.26	63.72
Cybb	Endogenous	145.46	96.9	78.57	184.83	156.5	101.84	353.01	187.29	182.97	234.95	158.97	190.84	157.47	200.25	249.1
Ddx58	Endogenous	174.4	119.18	104.95	150.96	157.67	123.38	230.7	182.36	220.28	164.69	189.25	227.55	191.08	237.87	235.59
Defb1	Endogenous	373.82	571.4	534.15	531.26	254.61	283.96	602.6	65.06	23.09	49.52	209.8	39.64	147.74	84.95	229.79
Defb14	Endogenous	241.65	334.15	450.31	335.79	72.41	74.42	834.29	18.73	42.63	64.5	139.51	39.64	30.96	36.41	88.83
Dpp4	Endogenous	78.21	120.3	90.3	104.51	141.32	134.15	69.61	120.26	81.72	58.74	127.61	192.31	176.05	67.96	59.86
Ebi3	Endogenous	54.74	32.3	34.01	41.61	73.58	44.06	55.69	35.49	62.17	64.5	43.26	52.85	48.66	54.61	63.72
Emr1	Endogenous	256.51	74.63	72.71	155.8	164.68	125.34	200.87	138.99	188.3	226.89	138.42	149.74	170.74	128.65	129.38
Entpd1	Endogenous	157.19	266.21	158.31	174.18	207.89	136.11	209.82	153.78	166.98	196.94	105.98	196.72	128.27	120.15	121.66
Eomes	Endogenous	9.38	6.68	11.14	14.52	22.19	22.52	23.87	13.8	33.75	21.88	14.06	24.96	21.23	24.27	25.1
Ets1	Endogenous	882.15	954.56	826.73	555.45	567.62	397.55	966.55	1197.68	1549.05	1223.11	1355.04	1698.52	920.03	1731.86	1428.97
Fadd	Endogenous	59.44	43.44	37.53	46.45	72.41	47.98	56.68	70.97	65.73	78.32	73.54	86.61	63.69	71.6	48.28
Fas	Endogenous	32.85	28.96	25.21	38.71	33.87	31.33	28.84	30.56	31.98	34.55	27.04	61.66	29.19	49.76	42.48
Fasl	Endogenous	5.47	15.59	7.62	5.81	10.51	14.69	15.91	10.84	12.43	13.82	14.06	11.74	5.31	10.92	15.45
Fcamr	Endogenous	14.08	18.94	13.49	22.26	24.53	23.5	25.85	12.81	28.42	25.34	31.36	17.62	27.42	23.06	17.38
Fcer1a	Endogenous	66.47	61.26	44.56	25.16	52.56	16.65	44.75	29.57	55.07	50.68	42.18	57.25	40.69	48.55	27.03
Fcer1g	Endogenous	187.69	219.43	137.79	226.44	177.53	118.48	228.71	169.55	179.42	232.64	155.73	249.57	214.97	174.76	169.93
Fcgr1	Endogenous	106.36	70.17	47.49	77.42	39.71	34.27	117.34	65.06	87.04	85.23	51.91	91.02	92.89	106.8	94.62
Fcgr2b	Endogenous	1912.12	922.26	898.85	1267.67	1048.81	545.41	3991.48	2115.41	2893.8	3179.86	1175.52	2043.51	1230.55	1967.31	1938.77
Fcgr3	Endogenous	195.51	57.92	56.87	125.8	128.47	83.23	222.74	113.36	103.03	162.39	118.96	139.46	119.43	120.15	183.45
Fcgr4	Endogenous	38.32	42.33	27.56	38.71	38.54	28.4	136.23	45.34	42.63	69.1	38.93	39.64	27.42	71.6	77.24
Fcgrt	Endogenous	648.32	335.27	319.55	427.72	531.41	327.05	652.32	610.18	753.21	640.35	484.48	609.24	507.79	449.05	488.55
Fkbp5	Endogenous	117.31	167.08	94.99	100.64	131.98	113.59	96.46	124.2	193.63	124.38	102.74	111.57	109.7	98.3	92.69
Fn1	Endogenous	1974.68	2606.39	2000.58	1624.75	2265.79	1180.9	1890.33	3322.95	4924.26	6123.62	2334.82	5330.44	2700.83	3143.32	2813.53
Folr4	Endogenous	11.73	11.14	5.28	10.64	16.35	9.79	9.94	3.94	19.54	14.97	6.49	8.81	7.08	12.14	11.59
Foxp3	Endogenous	26.59	37.87	21.69	20.32	29.2	16.65	26.85	13.8	10.66	25.34	20.55	30.83	16.81	12.14	19.31
Frmpd4	Endogenous	3.13	4.46	2.93	5.81	4.67	8.81	10.94	5.91	15.99	10.37	6.49	11.74	1.77	10.92	15.45
Fyn	Endogenous	541.18	512.37	477.86	328.05	489.36	316.28	531	772.82	985.92	921.36	576.41	1093.69	674.99	832.56	733.8
Gata3	Endogenous	441.08	259.53	478.45	880.6	463.67	926.31	353.01	222.78	51.52	69.1	352.55	88.08	418.44	100.73	73.38
Gfi1	Endogenous	3.13	5.57	4.1	3.87	10.51	4.9	3.98	7.89	12.43	9.21	7.57	10.28	1.77	4.85	9.66
Gm10499	Endogenous	76.64	51.24	76.22	126.77	129.64	129.25	156.12	73.93	71.06	48.37	104.9	66.06	67.23	98.3	88.83
Gp1bb	Endogenous	107.14	55.69	62.15	38.71	115.63	51.9	103.42	90.69	135.01	116.32	149.24	443.35	43.35	212.39	100.41
Gpi1	Endogenous	35.97	52.35	34.01	29.03	25.69	28.4	45.74	26.62	47.96	40.31	35.69	83.68	18.58	48.55	63.72
Gpr183	Endogenous	51.62	63.49	29.9	33.87	47.89	25.46	35.8	30.56	39.08	34.55	35.69	36.7	21.23	23.06	42.48
Gpr44	Endogenous	9.38	13.37	6.45	7.74	14.02	12.73	8.95	11.83	23.09	16.12	14.06	16.15	8.85	10.92	13.52
Gzma	Endogenous	11.73	23.39	19.94	24.19	23.36	20.56	39.78	21.69	35.53	31.1	14.06	33.76	29.19	40.05	32.83
Gzmb	Endogenous	10.17	10.02	8.8	12.58	22.19	4.9	9.94	6.9	12.43	10.37	17.3	5.87	9.73	10.92	23.17
H2-Aa	Endogenous	3987.68	4215.9	3102.89	3814.63	5454.26	3313.57	5480.07	2322.42	1762.22	2814.77	2866.89	2594.02	2638.02	2230.67	2460.15
H2-Ab1	Endogenous	2827.9	3423.95	2464.96	3204.02	4446.33	2597.78	3639.46	1875.87	1481.54	2334.51	1962.81	1760.18	1841.84	1674.82	1786.21
H2-DMa	Endogenous	298.74	153.71	211.08	316.43	365.56	225.21	351.02	197.15	172.31	230.34	256.3	205.53	204.35	150.49	171.86
H2-DMb2	Endogenous	89.15	66.83	58.05	80.32	88.76	52.88	87.51	35.49	30.2	48.37	70.29	44.04	53.96	46.12	36.69
H2-Ea-ps	Endogenous	3.91	8.91	5.86	6.77	5.84	7.83	3.98	4.93	7.11	9.21	6.49	4.4	7.96	3.64	9.66
H2-Eb1	Endogenous	1596.95	1251.96	1248.9	1637.33	1931.77	1283.71	1493.57	1201.62	1048.09	1539.83	1385.32	1287.47	997.88	1004.89	1004.14
H2-K1	Endogenous	1092.53	474.5	1236	1516.37	844.42	998.77	1534.34	647.64	500.95	404.25	1122.53	484.45	501.6	764.59	770.49
H2-Ob	Endogenous	21.9	52.35	24.63	36.77	40.88	24.48	39.78	15.77	42.63	39.16	30.28	46.98	23.89	36.41	38.62
H2-Q10	Endogenous	21.12	14.48	9.38	30.97	30.37	20.56	23.87	10.84	26.65	28.79	17.3	19.08	27.42	19.42	1.93
H60a	Endogenous	9.38	10.02	7.04	9.68	12.85	10.77	8.95	8.87	10.66	13.82	16.22	11.74	12.39	12.14	7.72
Hamp	Endogenous	7.04	5.57	4.1	18.39	10.51	14.69	6.96	5.91	12.43	5.76	14.06	17.62	8.85	14.56	5.79
Hc	Endogenous	23.46	20.05	12.9	9.68	18.69	13.71	13.92	15.77	40.86	23.03	15.14	14.68	15.92	32.77	19.31
Hcst	Endogenous	12.51	46.78	16.42	13.55	16.35	6.85	14.92	12.81	19.54	16.12	14.06	24.96	16.81	12.14	34.76
Hfe	Endogenous	299.53	130.32	136.62	180.96	256.95	150.79	323.18	216.86	289.56	201.55	166.54	184.97	158.35	211.17	220.14
Hif1a	Endogenous	446.55	417.69	457.34	543.84	369.07	358.38	568.79	405.14	380.16	401.95	394.72	368.48	313.17	343.46	372.69
Hlx	Endogenous	57.87	203.83	83.85	98.7	108.62	70.5	55.69	70.97	115.47	114.02	76.78	113.04	81.39	93.45	102.35
Icam1	Endogenous	88.37	53.46	64.5	80.32	52.56	59.73	107.39	58.16	53.29	64.5	50.83	38.17	56.62	38.84	54.07
Icam2	Endogenous	53.96	42.33	38.7	65.8	51.39	53.86	28.84	56.19	72.83	47.22	45.42	66.06	55.73	44.9	57.93
Icam4	Endogenous	11.73	30.07	9.97	12.58	19.85	13.71	12.93	20.7	30.2	14.97	12.98	22.02	11.5	10.92	19.31
Icam5	Endogenous	8.6	15.59	14.66	10.64	16.35	8.81	6.96	6.9	12.43	18.43	16.22	16.15	5.31	18.2	13.52
Icos	Endogenous	42.23	95.79	49.84	48.38	61.9	42.11	80.55	16.76	24.87	13.82	48.66	26.42	22.12	47.33	59.86
Icosl	Endogenous	147.81	223.88	143.65	118.06	147.16	99.88	121.32	108.43	145.67	169.3	204.39	217.27	172.51	166.27	171.86
Ifi204	Endogenous	96.97	54.58	53.94	78.38	71.24	66.58	118.33	123.22	79.94	78.32	85.43	89.55	100.85	98.3	69.52
Ifi35	Endogenous	204.9	287.37	230.43	198.38	181.03	162.55	284.4	164.62	191.85	155.48	202.23	170.29	120.31	218.45	177.66
Ifih1	Endogenous	155.63	149.26	136.62	156.77	170.52	139.04	239.65	142.93	166.98	146.27	145.99	161.48	133.58	185.69	158.35
Ifit2	Endogenous	112.62	44.55	61.57	67.74	80.59	45.04	140.21	185.32	259.36	187.73	151.4	259.84	134.47	237.87	229.79
Ifitm1	Endogenous	338.63	258.41	265.61	142.25	275.63	101.84	436.54	202.08	182.97	185.42	216.29	140.93	193.74	220.88	220.14
Ifna1	Endogenous	7.04	13.37	3.52	4.84	10.51	3.92	7.96	6.9	14.21	8.06	5.41	10.28	7.96	4.85	7.72
Ifna2	Endogenous	2.35	13.37	2.35	3.87	10.51	2.94	5.97	6.9	8.88	5.76	3.24	14.68	3.54	3.64	9.66
Ifnar1	Endogenous	602.96	480.07	439.75	361.92	385.42	314.32	580.72	590.46	758.53	693.33	568.84	911.65	552.91	743.96	643.04
Ifnar2	Endogenous	341.76	147.03	240.98	237.08	283.81	176.25	457.42	337.13	495.62	449.16	320.11	471.24	278.66	409	451.86
Ifnb1	Endogenous	7.82	11.14	6.45	13.55	7.01	7.83	7.96	8.87	15.99	9.21	8.65	16.15	7.96	6.07	9.66
Ifng	Endogenous	6.26	4.46	4.69	5.81	7.01	1.96	12.93	11.83	8.88	6.91	8.65	4.4	8.85	6.07	9.66
Ifngr1	Endogenous	966.62	986.87	809.73	909.63	783.68	658.01	1064.99	868.44	1140.47	1098.73	719.15	1080.48	720.1	813.14	1036.97
Ifngr2	Endogenous	436.39	232.79	344.77	395.78	365.56	324.11	465.37	418.94	518.72	502.14	392.56	364.07	345.01	338.6	370.76
Igf2r	Endogenous	229.92	189.35	203.46	177.09	228.92	188.98	175.01	257.28	277.12	253.38	227.1	265.71	188.43	197.82	252.97
Ikbkap	Endogenous	147.03	239.48	177.07	141.28	129.64	112.61	108.39	207.01	257.58	206.16	226.02	249.57	198.16	208.75	206.62
Ikbkb	Endogenous	138.42	126.98	97.33	102.57	119.13	93.02	130.26	116.32	163.43	137.05	221.69	277.46	168.08	242.73	247.17
Ikbke	Endogenous	101.67	50.12	63.91	78.38	61.9	64.63	97.45	56.19	44.41	63.34	165.46	127.72	88.46	97.09	104.28
Ikbkg	Endogenous	86.03	71.29	77.4	81.29	54.89	85.19	60.66	71.96	87.04	96.74	91.92	95.42	75.2	83.74	88.83
Ikzf1	Endogenous	35.97	44.55	22.87	24.19	33.87	21.54	24.86	21.69	28.42	43.76	34.61	42.57	30.08	37.62	34.76
Ikzf2	Endogenous	143.9	101.36	84.43	155.8	144.82	139.04	105.41	70.97	99.48	82.92	155.73	138	97.31	114.08	131.31
Ikzf3	Endogenous	14.86	18.94	17	25.16	17.52	17.63	19.89	13.8	35.53	17.28	16.22	24.96	8.85	30.34	27.03
Ikzf4	Endogenous	27.37	44.55	22.87	30	52.56	30.35	28.84	33.52	40.86	33.4	32.44	45.51	27.42	37.62	23.17
Il10	Endogenous	3.13	2.23	4.1	11.61	4.67	3.92	11.93	4.93	10.66	6.91	7.57	11.74	8.85	14.56	9.66
Il10ra	Endogenous	76.64	65.72	45.73	70.64	77.08	53.86	95.46	66.04	87.04	85.23	78.94	107.17	80.5	104.37	113.93
Il10rb	Endogenous	578.72	494.55	387.57	360.95	365.56	326.07	676.18	663.41	840.25	719.82	632.64	751.64	487.44	713.62	923.04
Il11ra1	Endogenous	57.87	73.51	57.46	34.84	54.89	58.75	49.72	74.92	67.5	62.19	50.83	77.81	71.66	46.12	44.41
Il12a	Endogenous	14.86	35.64	17	28.06	35.04	18.6	24.86	18.73	40.86	23.03	28.12	33.76	35.39	20.63	46.35
Il12b	Endogenous	21.12	28.96	14.07	26.13	36.21	23.5	32.81	22.67	46.19	31.1	20.55	33.76	30.96	20.63	32.83
Il12rb1	Endogenous	16.42	31.19	14.66	17.42	30.37	12.73	20.88	18.73	19.54	18.43	20.55	23.49	10.62	25.49	25.1
Il12rb2	Endogenous	22.68	41.21	28.14	62.9	28.03	52.88	29.83	9.86	10.66	9.21	33.52	14.68	20.35	9.71	9.66
Il13	Endogenous	34.41	57.92	26.97	41.61	50.22	28.4	27.84	31.54	87.04	36.85	33.52	41.11	32.73	57.04	73.38
Il13ra1	Endogenous	714.8	1051.47	864.85	933.82	596.81	642.35	907.88	287.84	243.37	222.28	410.95	236.35	310.51	252.44	426.76
Il15	Endogenous	24.24	54.58	21.11	22.26	24.53	32.31	34.8	29.57	31.98	43.76	32.44	57.25	27.42	23.06	54.07
Il15ra	Endogenous	50.83	41.21	32.25	42.58	32.7	26.44	35.8	17.74	23.09	17.28	40.01	46.98	38.04	29.13	36.69
Il16	Endogenous	137.64	105.82	75.05	78.38	114.46	64.63	105.41	111.39	165.21	161.24	155.73	478.58	129.16	203.89	164.14
Il17a	Endogenous	21.9	27.85	9.38	22.26	17.52	20.56	19.89	12.81	23.09	13.82	17.3	20.55	8.85	16.99	30.9
Il17b	Endogenous	12.51	11.14	10.55	9.68	25.69	10.77	10.94	14.79	21.32	14.97	8.65	14.68	11.5	13.35	27.03
Il17f	Endogenous	17.99	10.02	10.55	13.55	10.51	15.67	10.94	5.91	8.88	8.06	10.81	22.02	10.62	14.56	23.17
Il17ra	Endogenous	111.83	64.6	70.95	97.74	81.76	92.04	119.33	63.09	104.81	81.77	116.8	86.61	94.66	70.39	79.17
Il17rb	Endogenous	19.55	28.96	12.31	15.48	16.35	19.58	18.89	14.79	15.99	14.97	32.44	17.62	23.89	23.06	21.24
Il17re	Endogenous	40.67	53.46	54.53	52.26	45.55	52.88	41.76	25.63	28.42	18.43	45.42	11.74	32.73	16.99	32.83
Il18	Endogenous	104.8	89.11	126.06	165.47	113.29	97.92	137.23	33.52	14.21	10.37	117.88	48.45	54.85	27.91	54.07
Il18r1	Endogenous	89.94	55.69	77.98	86.12	85.26	72.46	109.38	27.6	24.87	24.19	76.78	46.98	51.31	38.84	88.83
Il18rap	Endogenous	22.68	45.67	22.28	19.35	37.37	19.58	26.85	18.73	31.98	27.64	30.28	24.96	35.39	20.63	17.38
Il19	Endogenous	77.42	72.4	112.58	96.77	9.34	11.75	365.93	4.93	10.66	19.58	19.47	17.62	7.08	24.27	34.76
Il1a	Endogenous	64.13	61.26	78.57	83.22	59.56	55.81	82.53	22.67	47.96	29.94	50.83	33.76	32.73	20.63	42.48
Il1b	Endogenous	36.76	52.35	24.63	39.68	39.71	17.63	154.13	9.86	14.21	19.58	19.47	29.36	38.04	60.68	57.93
Il1r1	Endogenous	261.21	315.22	239.23	208.05	231.25	232.07	254.56	258.27	270.02	331.69	243.32	280.4	319.36	252.44	177.66
Il1r2	Endogenous	175.96	59.03	69.77	210.96	225.41	204.65	136.23	39.43	10.66	42.61	75.7	95.42	72.54	31.55	48.28
Il1rap	Endogenous	1473.39	1186.24	1172.09	866.08	909.82	531.7	1479.65	1517.06	2124.61	2089.19	1117.12	1648.61	1120.85	1411.46	1643.32
Il1rl1	Endogenous	114.18	95.79	76.81	64.84	133.14	57.77	102.42	63.09	104.81	86.38	91.92	117.44	91.12	133.5	113.93
Il1rl2	Endogenous	239.31	246.16	293.75	322.24	239.43	238.92	296.33	209.96	198.96	130.14	231.43	186.44	199.93	160.2	191.17
Il1rn	Endogenous	219.76	233.91	286.13	364.82	182.2	312.36	374.88	88.72	28.42	52.98	150.32	51.38	107.04	48.55	133.24
Il2	Endogenous	10.95	13.37	4.69	6.77	15.18	8.81	10.94	7.89	12.43	2.3	9.73	14.68	9.73	8.5	13.52
Il20	Endogenous	10.17	16.71	8.21	10.64	24.53	15.67	17.9	10.84	42.63	12.67	18.38	23.49	13.27	13.35	34.76
Il21	Endogenous	8.6	14.48	4.1	11.61	8.18	6.85	6.96	12.81	21.32	11.52	7.57	11.74	8.85	14.56	11.59
Il21r	Endogenous	14.86	14.48	6.45	6.77	9.34	1.96	8.95	11.83	10.66	6.91	28.12	24.96	11.5	24.27	5.79
Il22	Endogenous	5.47	8.91	4.1	4.84	4.67	5.88	3.98	4.93	10.66	8.06	6.49	5.87	4.42	8.5	3.86
Il22ra2	Endogenous	37.54	31.19	15.24	46.45	38.54	40.15	9.94	22.67	39.08	25.34	19.47	26.42	14.15	13.35	27.03
Il23a	Endogenous	9.38	11.14	9.38	12.58	9.34	8.81	20.88	9.86	8.88	8.06	20.55	10.28	2.65	10.92	13.52
Il23r	Endogenous	17.99	14.48	12.31	18.39	10.51	15.67	7.96	15.77	23.09	18.43	16.22	11.74	9.73	10.92	11.59
Il25	Endogenous	7.04	12.25	9.38	6.77	12.85	4.9	9.94	13.8	23.09	11.52	15.14	11.74	8.85	14.56	9.66
Il27	Endogenous	7.82	20.05	6.45	14.52	15.18	6.85	8.95	4.93	12.43	6.91	14.06	17.62	8.85	13.35	9.66
Il27ra	Endogenous	33.63	61.26	30.49	25.16	32.7	20.56	46.74	42.39	62.17	43.76	45.42	58.72	49.54	49.76	56
Il28a	Endogenous	9.38	17.82	9.97	13.55	22.19	16.65	12.93	9.86	35.53	11.52	15.14	17.62	21.23	20.63	30.9
Il2ra	Endogenous	64.13	73.51	38.7	52.26	63.07	32.31	100.43	18.73	23.09	17.28	36.77	16.15	26.54	35.2	40.55
Il2rb	Endogenous	68.04	145.91	65.08	102.57	80.59	50.92	161.09	45.34	44.41	44.92	71.37	49.91	53.08	42.48	69.52
Il2rg	Endogenous	70.38	61.26	73.29	131.61	98.11	73.44	113.36	69.99	56.85	74.86	98.41	49.91	69.89	53.4	79.17
Il3	Endogenous	9.38	7.8	8.21	8.71	11.68	7.83	9.94	12.81	17.76	8.06	9.73	19.08	8.85	13.35	3.86
Il33	Endogenous	327.68	267.32	370.56	320.3	136.65	108.69	541.94	103.5	145.67	194.64	166.54	117.44	123.85	108.01	135.17
Il4	Endogenous	17.99	11.14	4.69	14.52	15.18	5.88	23.87	9.86	14.21	13.82	11.9	17.62	6.19	10.92	9.66
Il4ra	Endogenous	692.12	427.72	633.83	778.99	351.55	299.63	1049.08	466.26	332.19	445.71	617.5	512.35	415.78	462.4	563.86
Il5	Endogenous	14.08	20.05	9.97	3.87	5.84	4.9	7.96	6.9	15.99	3.46	11.9	16.15	7.96	15.78	21.24
Il6	Endogenous	39.88	53.46	22.28	23.22	40.88	19.58	78.56	17.74	47.96	36.85	37.85	52.85	30.96	30.34	27.03
Il6ra	Endogenous	216.63	174.87	130.17	291.27	270.96	270.26	173.02	155.75	161.65	143.96	182.76	218.74	154.81	101.95	106.21
Il6st	Endogenous	804.73	907.78	652.01	513.84	687.91	445.53	871.08	882.24	1275.48	1132.13	694.28	1030.56	628.99	873.82	805.24
Il7	Endogenous	17.99	35.64	9.38	13.55	26.86	15.67	20.88	18.73	15.99	11.52	19.47	24.96	16.81	18.2	28.97
Il7r	Endogenous	57.87	138.12	65.08	75.48	100.44	72.46	107.39	42.39	53.29	44.92	71.37	44.04	47.77	57.04	84.97
Il9	Endogenous	6.26	22.28	12.31	16.45	18.69	15.67	15.91	13.8	35.53	18.43	11.9	29.36	16.81	24.27	30.9
Ilf3	Endogenous	150.94	80.2	88.54	115.15	107.45	83.23	119.33	154.76	184.75	164.69	129.77	176.16	166.31	173.55	150.62
Irak1	Endogenous	200.21	122.52	150.1	137.41	134.31	123.38	148.16	148.85	227.38	200.4	246.57	249.57	180.47	209.96	195.04
Irak2	Endogenous	104.01	188.24	112.58	114.19	127.3	97.92	104.41	79.85	87.04	97.89	153.56	202.59	101.73	172.34	140.97
Irak3	Endogenous	115.74	86.88	95.57	132.57	124.97	102.81	144.19	101.53	110.14	107.11	126.53	121.85	98.2	115.3	98.48
Irak4	Endogenous	298.74	252.84	203.46	248.7	226.58	153.73	318.2	234.61	312.65	293.68	243.32	394.9	222.93	316.76	280
Irf1	Endogenous	343.32	317.45	283.79	359.98	259.28	246.76	589.67	321.35	355.29	374.3	342.82	380.22	343.24	639.59	424.83
Irf3	Endogenous	36.76	40.1	23.45	29.03	40.88	23.5	33.81	40.42	49.74	40.31	59.48	66.06	38.92	52.19	38.62
Irf4	Endogenous	32.85	40.1	31.08	37.74	56.06	32.31	32.81	47.32	39.08	41.46	43.26	52.85	46.89	33.98	27.03
Irf5	Endogenous	194.73	209.4	133.68	196.44	148.33	137.09	188.93	144.9	108.36	146.27	226.02	208.46	234.43	171.12	162.21
Irf7	Endogenous	29.72	23.39	11.14	34.84	29.2	22.52	43.75	26.62	12.43	14.97	32.44	33.76	44.23	37.62	30.9
Irf8	Endogenous	62.56	74.63	55.7	60.96	45.55	36.23	77.56	44.36	58.62	65.65	56.23	55.79	51.31	66.75	73.38
Irgm1	Endogenous	232.27	405.44	245.67	319.34	231.25	230.11	756.73	263.19	287.78	247.62	334.16	349.39	219.39	877.46	461.52
Itga2b	Endogenous	25.81	14.48	14.07	11.61	33.87	13.71	13.92	12.81	17.76	11.52	27.04	32.3	21.23	26.7	17.38
Itga4	Endogenous	570.12	834.27	362.94	240.95	262.79	147.86	366.93	475.13	667.94	803.89	408.78	726.68	496.29	605.61	509.8
Itga5	Endogenous	189.26	135.89	124.3	108.38	171.69	100.86	174.02	213.91	259.36	247.62	174.11	251.03	151.27	196.61	185.38
Itga6	Endogenous	1406.13	984.64	1213.71	1496.05	1400.35	1138.79	1302.65	1273.58	1719.58	1220.81	1289.07	1096.62	947.46	1212.42	1295.73
Itgal	Endogenous	49.27	45.67	25.8	43.55	32.7	35.25	79.55	21.69	40.86	49.52	37.85	32.3	38.92	58.25	65.66
Itgam	Endogenous	129.82	52.35	36.35	98.7	91.1	73.44	129.27	93.65	106.59	164.69	89.76	99.83	100.85	78.89	69.52
Itgax	Endogenous	84.46	265.09	133.1	136.44	122.63	76.38	198.88	100.55	108.36	125.54	177.36	145.34	106.16	172.34	241.38
Itgb1	Endogenous	4943.35	3860.58	3646.42	3006.61	3982.66	2432.3	4788.97	5436.39	7361.52	6910.23	3925.61	6278.8	4256.04	5653.12	6930.51
Itgb2	Endogenous	226.8	263.98	184.7	246.76	221.91	154.71	327.15	216.86	216.72	275.26	236.83	261.31	214.08	265.79	280
Itln1	Endogenous	7.82	14.48	3.52	12.58	11.68	13.71	17.9	15.77	17.76	10.37	19.47	24.96	9.73	8.5	13.52
Jak1	Endogenous	1254.41	848.75	995.6	1099.29	1103.7	900.85	1201.22	1180.92	1465.55	1415.45	1124.69	1673.56	984.61	1419.96	1336.28
Jak2	Endogenous	427.78	448.88	377.6	340.63	394.76	252.63	373.89	337.13	437	398.49	477.99	858.8	335.28	620.17	544.55
Jak3	Endogenous	55.53	89.11	55.7	55.16	72.41	43.08	35.8	42.39	67.5	64.5	70.29	98.36	52.19	70.39	69.52
Kir3dl1	Endogenous	13.29	14.48	9.97	12.58	16.35	19.58	6.96	14.79	23.09	13.82	10.81	16.15	16.81	10.92	17.38
Kir3dl2	Endogenous	8.6	8.91	5.28	16.45	15.18	13.71	8.95	7.89	23.09	6.91	6.49	14.68	7.08	14.56	13.52
Kit	Endogenous	11.73	5.57	22.87	18.39	17.52	23.5	29.83	17.74	15.99	19.58	40.01	19.08	23	31.55	28.97
Klra1	Endogenous	7.82	3.34	8.8	7.74	9.34	12.73	7.96	14.79	21.32	8.06	16.22	7.34	8.85	13.35	17.38
Klra21	Endogenous	3.91	15.59	2.93	1	4.67	6.85	3.98	3.94	17.76	10.37	6.49	11.74	3.54	7.28	13.52
Klra4	Endogenous	7.04	7.8	2.93	1	8.18	2.94	11.93	2.96	14.21	6.91	5.41	13.21	3.54	6.07	17.38
Klra5	Endogenous	5.47	8.91	4.69	10.64	3.5	5.88	5.97	2.96	14.21	8.06	7.57	8.81	4.42	7.28	9.66
Klra6	Endogenous	5.47	8.91	6.45	10.64	10.51	7.83	8.95	9.86	17.76	6.91	9.73	7.34	6.19	9.71	9.66
Klra7	Endogenous	5.47	8.91	2.35	7.74	10.51	7.83	11.93	7.89	14.21	11.52	15.14	8.81	10.62	7.28	13.52
Klra8	Endogenous	17.21	20.05	8.8	12.58	22.19	19.58	34.8	13.8	31.98	16.12	17.3	29.36	14.15	35.2	19.31
Klrb1	Endogenous	5.47	2.23	2.93	6.77	16.35	11.75	15.91	13.8	23.09	9.21	10.81	5.87	4.42	8.5	11.59
Klrc1	Endogenous	17.99	14.48	10.55	18.39	11.68	19.58	30.83	10.84	19.54	10.37	16.22	17.62	16.81	14.56	19.31
Klrc2	Endogenous	16.42	33.42	15.24	30.97	36.21	29.38	20.88	27.6	39.08	27.64	14.06	46.98	25.65	40.05	23.17
Klrc3	Endogenous	7.04	13.37	6.45	10.64	7.01	15.67	1	8.87	8.88	9.21	8.65	17.62	3.54	9.71	17.38
Klrd1	Endogenous	35.97	101.36	32.25	48.38	36.21	32.31	83.53	19.71	37.3	33.4	56.23	61.66	35.39	57.04	73.38
Klrk1	Endogenous	38.32	65.72	35.18	48.38	59.56	35.25	85.52	38.44	33.75	34.55	36.77	36.7	24.77	49.76	63.72
Lair1	Endogenous	35.97	34.53	26.97	37.74	33.87	24.48	51.71	35.49	53.29	50.68	38.93	51.38	34.5	86.17	63.72
Lck	Endogenous	44.58	63.49	42.8	52.26	43.21	47.98	98.44	22.67	30.2	20.73	57.32	32.3	33.62	23.06	57.93
Lcp2	Endogenous	140.77	164.85	84.43	178.05	223.08	148.84	130.26	153.78	273.57	232.64	152.48	221.67	150.39	158.99	326.35
Lef1	Endogenous	72.73	66.83	63.32	57.09	50.22	124.36	48.73	120.26	63.95	40.31	108.14	55.79	221.16	88.6	59.86
Lif	Endogenous	49.27	71.29	31.66	36.77	37.37	28.4	35.8	38.44	71.06	111.72	50.83	148.27	52.19	84.95	59.86
Lilra5	Endogenous	18.77	35.64	24.63	24.19	30.37	20.56	28.84	25.63	51.52	34.55	22.71	29.36	16.81	33.98	59.86
Lilra6	Endogenous	11.73	16.71	8.8	15.48	23.36	9.79	11.93	10.84	23.09	23.03	20.55	29.36	17.69	13.35	21.24
Lilrb3	Endogenous	112.62	124.75	53.36	110.32	117.96	88.13	147.17	79.85	81.72	95.59	133.02	201.12	143.31	123.79	119.72
Lilrb4	Endogenous	251.04	194.92	105.54	138.38	141.32	111.63	312.24	105.47	65.73	96.74	391.48	283.33	365.36	241.51	278.07
Litaf	Endogenous	468.45	202.72	360.6	446.1	282.64	300.61	547.91	394.3	410.35	449.16	377.42	309.76	282.2	400.5	359.17
Lta	Endogenous	17.21	26.73	19.35	17.42	33.87	11.75	19.89	17.74	37.3	24.19	24.87	16.15	21.23	16.99	36.69
Ltb	Endogenous	45.36	59.03	46.32	45.48	51.39	39.17	89.49	24.64	23.09	47.22	41.09	29.36	31.85	32.77	52.14
Ltb4r1	Endogenous	93.06	62.38	76.22	143.22	63.07	62.67	122.31	43.37	53.29	55.28	71.37	54.32	53.08	46.12	69.52
Ltb4r2	Endogenous	50.83	62.38	49.84	76.45	45.55	36.23	41.76	22.67	33.75	35.7	45.42	42.57	32.73	27.91	44.41
Ltbr	Endogenous	485.65	452.22	455.58	419.98	425.13	369.15	578.73	548.07	705.24	673.75	502.87	685.57	501.6	601.96	616
Ltf	Endogenous	11.73	17.82	7.62	14.52	19.85	15.67	11.93	18.73	28.42	23.03	9.73	19.08	10.62	18.2	32.83
Ly86	Endogenous	269.03	135.89	89.12	230.31	233.59	106.73	247.6	172.51	241.59	200.4	194.66	239.29	265.39	196.61	202.76
Ly96	Endogenous	121.22	75.74	74.46	96.77	91.1	92.04	125.29	82.8	90.6	71.41	86.51	96.89	82.27	82.53	135.17
Maf	Endogenous	193.95	130.32	120.79	150.96	163.51	170.38	83.53	165.61	143.89	152.03	160.05	189.38	232.66	127.43	119.72
Map4k1	Endogenous	20.33	18.94	18.76	12.58	29.2	14.69	23.87	12.81	17.76	24.19	20.55	26.42	25.65	20.63	25.1
Map4k2	Endogenous	75.08	95.79	69.19	60.96	96.94	63.65	63.64	74.92	117.24	81.77	99.49	120.38	80.5	115.3	102.35
Map4k4	Endogenous	956.45	885.51	746.99	680.29	745.14	504.28	938.7	1120.79	1600.56	1561.71	1194.99	2416.39	819.18	1998.86	1539.04
Mapk1	Endogenous	828.19	884.39	775.72	794.47	766.17	858.75	807.44	750.15	772.75	806.19	716.99	836.78	774.07	756.1	843.87
Mapk11	Endogenous	25.03	23.39	19.94	26.13	17.52	18.6	15.91	24.64	33.75	28.79	37.85	30.83	38.92	26.7	21.24
Mapk14	Endogenous	466.1	275.12	342.42	407.4	388.92	367.2	439.52	377.54	367.72	416.92	474.75	521.15	470.63	508.51	376.55
Mapkapk2	Endogenous	377.73	207.17	338.32	326.11	330.53	333.9	359.97	346.98	362.39	375.46	357.96	367.01	332.63	328.9	332.14
Marco	Endogenous	11.73	15.59	5.28	16.45	16.35	19.58	11.93	5.91	12.43	20.73	11.9	4.4	7.96	15.78	7.72
Masp1	Endogenous	25.81	63.49	34.01	35.8	44.38	40.15	40.77	15.77	24.87	19.58	36.77	24.96	23	24.27	23.17
Masp2	Endogenous	6.26	17.82	8.21	3.87	8.18	7.83	8.95	3.94	14.21	5.76	6.49	13.21	4.42	4.85	5.79
Mbl2	Endogenous	7.82	5.57	8.21	7.74	16.35	8.81	3.98	4.93	12.43	5.76	4.33	10.28	7.08	4.85	9.66
Mbp	Endogenous	35.97	36.76	77.98	47.42	36.21	50.92	34.8	55.2	72.83	50.68	48.66	54.32	40.69	46.12	57.93
Mif	Endogenous	941.59	649.37	1428.31	1315.09	816.39	1008.56	915.83	859.57	655.5	621.92	903	487.39	708.6	611.67	708.69
Mme	Endogenous	104.8	178.21	88.54	62.9	96.94	123.38	75.57	57.17	67.5	42.61	77.86	38.17	85.81	71.6	65.66
Mr1	Endogenous	155.63	159.28	111.99	110.32	157.67	103.79	187.94	172.51	190.08	139.36	137.34	182.04	85.81	161.41	123.59
Ms4a1	Endogenous	8.6	17.82	10.55	9.68	8.18	13.71	13.92	20.7	10.66	12.67	15.14	10.28	13.27	13.35	21.24
Msr1	Endogenous	57.87	86.88	52.77	43.55	51.39	31.33	76.57	41.4	53.29	59.89	59.48	79.27	76.96	70.39	96.55
Muc1	Endogenous	23.46	30.07	22.87	28.06	17.52	10.77	21.88	28.59	33.75	27.64	33.52	41.11	30.08	27.91	36.69
Mx1	Endogenous	72.73	91.34	34.01	32.9	49.05	23.5	47.73	75.9	87.04	94.44	156.81	240.76	138.89	171.12	146.76
Myd88	Endogenous	239.31	94.68	166.52	204.18	148.33	140.02	298.32	148.85	193.63	156.63	181.68	143.87	136.24	155.35	164.14
Ncam1	Endogenous	990.86	784.15	643.21	501.26	461.33	280.05	1155.48	1736.88	2678.85	2184.78	888.94	1644.2	985.5	1560.74	1315.04
Ncf4	Endogenous	117.31	158.17	79.74	93.87	94.6	57.77	129.27	86.75	62.17	141.66	118.96	162.95	119.43	122.58	127.45
Nfatc1	Endogenous	132.17	119.18	114.34	106.45	112.12	107.71	110.38	102.52	161.65	138.2	155.73	165.89	124.74	140.78	113.93
Nfatc2	Endogenous	464.54	331.93	358.84	213.86	447.32	221.3	387.81	364.73	595.1	597.73	843.52	2519.15	337.05	1409.03	1050.49
Nfatc3	Endogenous	130.6	109.16	98.5	131.61	122.63	128.27	121.32	135.05	129.68	141.66	84.35	130.66	103.5	97.09	100.41
Nfil3	Endogenous	171.27	164.85	138.96	125.8	130.81	228.15	155.12	146.88	120.8	119.78	191.41	182.04	221.16	179.62	140.97
Nfkb1	Endogenous	403.54	222.77	350.63	381.27	309.5	296.69	439.52	313.47	337.52	291.38	418.52	408.11	341.47	328.9	393.93
Nfkb2	Endogenous	257.3	522.39	369.98	285.47	289.65	217.38	265.5	251.37	289.56	274.11	342.82	334.71	281.32	316.76	262.62
Nfkbia	Endogenous	178.31	132.55	140.72	206.12	178.69	136.11	151.15	118.29	184.75	142.81	168.7	182.04	98.2	205.1	139.04
Nfkbiz	Endogenous	294.83	199.38	245.09	242.89	174.02	172.34	248.6	196.16	216.72	222.28	388.24	478.58	290.16	563.13	345.66
Nod2	Endogenous	26.59	14.48	32.25	30	25.69	25.46	41.76	14.79	21.32	21.88	25.95	14.68	11.5	20.63	42.48
Nos2	Endogenous	7.82	17.82	7.62	15.48	14.02	15.67	20.88	17.74	33.75	19.58	14.06	26.42	16.81	13.35	32.83
Notch1	Endogenous	557.6	445.54	472	470.3	448.49	632.55	408.69	744.24	811.83	727.88	751.6	810.36	965.15	758.52	523.31
Notch2	Endogenous	345.67	233.91	289.65	315.47	374.91	419.09	278.43	297.7	332.19	279.86	354.71	234.89	337.05	236.66	204.69
Nox1	Endogenous	7.82	13.37	11.14	5.81	11.68	10.77	13.92	9.86	21.32	13.82	23.79	8.81	8.85	15.78	11.59
Nox3	Endogenous	6.26	5.57	4.1	3.87	3.5	4.9	1.99	5.91	7.11	3.46	6.49	13.21	1	3.64	5.79
Nox4	Endogenous	53.96	43.44	32.25	48.38	42.05	29.38	61.65	57.17	51.52	61.04	31.36	74.87	61.93	47.33	71.45
Npc1	Endogenous	502.08	465.59	499.56	480.94	506.88	510.16	520.07	608.21	614.64	535.54	622.91	678.23	616.6	592.26	478.9
Nt5e	Endogenous	194.73	209.4	191.15	223.54	235.92	223.25	272.46	210.95	197.18	198.09	192.5	330.31	173.39	246.37	256.83
Pax5	Endogenous	13.29	33.42	7.62	18.39	29.2	18.6	14.92	27.6	33.75	31.1	20.55	30.83	20.35	23.06	44.41
Pdcd1	Endogenous	14.08	28.96	7.62	17.42	15.18	11.75	19.89	14.79	19.54	12.67	16.22	22.02	10.62	19.42	21.24
Pdcd1lg2	Endogenous	20.33	33.42	11.73	19.35	19.85	8.81	32.81	4.93	21.32	9.21	19.47	11.74	8.85	9.71	19.31
Pdcd2	Endogenous	50.83	101.36	63.91	49.35	71.24	58.75	46.74	58.16	51.52	69.1	50.83	70.47	57.5	58.25	77.24
Pdgfb	Endogenous	464.54	178.21	285.55	306.76	276.8	140.02	374.88	609.19	875.78	836.14	503.95	801.55	410.48	707.55	573.52
Pdgfrb	Endogenous	269.81	435.51	271.47	151.93	141.32	75.4	123.3	276.01	477.86	365.09	164.38	315.63	217.62	212.39	185.38
Pecam1	Endogenous	369.91	144.8	245.09	382.24	460.17	380.9	379.86	388.38	502.73	434.19	267.11	322.97	317.59	291.27	260.69
Phlpp1	Endogenous	205.68	198.26	181.76	167.41	160.01	147.86	165.07	216.86	239.82	184.27	232.51	305.35	176.93	231.8	196.97
Phlpp2	Endogenous	69.6	90.22	61.57	59.03	57.23	47	79.55	100.55	90.6	100.2	113.55	114.51	93.77	110.44	92.69
Pigr	Endogenous	12.51	8.91	8.21	5.81	19.85	10.77	9.94	10.84	26.65	10.37	14.06	8.81	12.39	13.35	23.17
Pla2g2a	Endogenous	6.26	10.02	4.1	1.94	11.68	4.9	4.97	5.91	10.66	3.46	8.65	4.4	6.19	12.14	13.52
Pla2g2e	Endogenous	82.12	51.24	87.95	39.68	74.75	119.46	24.86	123.22	62.17	39.16	136.26	42.57	227.35	78.89	77.24
Plau	Endogenous	322.21	422.15	377.01	379.33	219.57	232.07	379.86	380.5	405.03	337.45	335.25	374.35	365.36	288.85	388.14
Plaur	Endogenous	116.53	251.73	165.93	121.93	106.28	95.96	220.75	107.45	99.48	193.49	133.02	130.66	118.54	146.85	166.07
Pml	Endogenous	182.22	89.11	101.44	155.8	175.19	113.59	171.03	201.09	234.49	264.89	214.12	252.5	193.74	206.32	198.9
Pou2f2	Endogenous	42.23	23.39	21.69	19.35	35.04	19.58	43.75	24.64	51.52	34.55	41.09	41.11	43.35	31.55	25.1
Pparg	Endogenous	59.44	69.06	40.46	45.48	72.41	67.56	23.87	29.57	21.32	36.85	44.34	26.42	33.62	25.49	34.76
Ppbp	Endogenous	5.47	10.02	5.86	4.84	23.36	4.9	21.88	11.83	10.66	10.37	10.81	11.74	15.92	13.35	19.31
Prdm1	Endogenous	183	63.49	202.87	190.63	126.14	197.8	193.91	100.55	51.52	47.22	177.36	45.51	171.62	95.88	65.66
Prf1	Endogenous	9.38	5.57	8.8	19.35	14.02	21.54	11.93	6.9	10.66	11.52	10.81	7.34	5.31	1.21	11.59
Prim1	Endogenous	184.56	203.83	158.9	174.18	153	180.17	112.37	168.56	198.96	181.97	197.9	176.16	276.01	190.54	249.1
Prkcd	Endogenous	459.06	314.1	295.51	417.07	301.33	405.38	390.79	279.95	222.05	275.26	462.85	418.39	420.21	338.6	366.9
Psmb10	Endogenous	65.69	81.31	79.74	55.16	47.89	45.04	77.56	84.77	101.26	77.16	64.89	66.06	59.27	110.44	57.93
Psmb11	Endogenous	7.04	17.82	4.69	17.42	14.02	12.73	11.93	3.94	14.21	14.97	12.98	10.28	14.15	10.92	11.59
Psmb5	Endogenous	723.4	912.24	772.79	718.02	715.94	819.58	724.91	617.08	575.56	604.65	558.02	619.51	627.22	638.37	670.07
Psmb7	Endogenous	901.71	615.96	817.35	996.72	974.06	1252.38	1041.12	760.01	790.51	731.33	727.81	610.7	744.87	703.91	766.62
Psmb9	Endogenous	98.54	227.22	109.64	135.48	119.13	94	149.16	107.45	106.59	93.29	118.96	139.46	90.23	167.48	129.38
Psmc2	Endogenous	1363.12	1717.55	1532.68	1408.95	1407.36	1652.87	1352.37	1345.54	1364.3	1353.25	1104.15	1274.26	1220.82	1216.06	1266.76
Psmd7	Endogenous	1087.83	1629.55	1338.6	1077.04	1024.28	1259.23	1035.16	1079.39	1238.17	1209.29	1172.28	1572.27	1153.58	1470.93	1365.25
Ptafr	Endogenous	171.27	343.06	132.51	162.57	168.18	146.88	124.3	151.8	204.29	238.4	182.76	209.93	179.58	156.56	179.59
Ptger4	Endogenous	93.06	99.13	60.39	81.29	72.41	90.09	72.59	69	88.82	59.89	108.14	77.81	101.73	78.89	100.41
Ptgs2	Endogenous	29.72	17.82	21.69	26.13	15.18	34.27	101.43	20.7	14.21	16.12	17.3	10.28	15.92	29.13	19.31
Ptk2	Endogenous	385.55	668.31	375.84	269.99	303.66	289.84	349.03	432.74	573.79	616.16	467.18	731.08	440.56	628.66	546.49
Ptpn2	Endogenous	142.33	241.7	150.1	108.38	134.31	151.77	164.07	121.25	136.78	157.78	163.3	270.12	197.28	235.45	241.38
Ptpn22	Endogenous	45.36	63.49	35.18	49.35	39.71	24.48	53.7	31.54	23.09	32.25	61.64	61.66	41.58	43.69	57.93
Ptpn6	Endogenous	226.01	209.4	169.45	206.12	147.16	192.9	283.4	181.38	250.48	252.22	198.98	252.5	199.05	267	237.52
Ptprc	Endogenous	219.76	256.18	126.65	199.34	195.05	158.63	225.73	150.82	159.88	231.49	198.98	355.27	219.39	265.79	270.35
Rae1	Endogenous	333.15	296.28	343.59	269.99	276.8	290.82	295.33	380.5	392.59	391.58	432.57	550.51	393.67	526.72	461.52
Rag1	Endogenous	10.17	11.14	5.28	8.71	8.18	8.81	15.91	12.81	19.54	11.52	11.9	13.21	13.27	10.92	17.38
Rag2	Endogenous	5.47	5.57	3.52	6.77	4.67	4.9	8.95	8.87	12.43	11.52	4.33	19.08	6.19	9.71	5.79
Rela	Endogenous	284.67	393.19	294.93	224.5	226.58	182.13	343.06	272.07	396.14	390.43	329.84	364.07	240.62	322.83	303.17
Relb	Endogenous	209.59	138.12	134.86	160.64	149.5	143.94	186.95	103.5	149.22	118.63	228.18	155.61	161.01	168.7	139.04
Rorc	Endogenous	64.91	46.78	55.7	101.61	135.48	161.57	47.73	45.34	28.42	13.82	112.47	69	92	52.19	63.72
Runx1	Endogenous	283.1	373.14	341.83	366.75	263.95	261.44	361.96	265.17	193.63	225.73	296.31	243.69	233.55	240.3	252.97
Runx3	Endogenous	23.46	32.3	25.21	35.8	16.35	39.17	28.84	11.83	15.99	16.12	24.87	17.62	16.81	12.14	23.17
S100a8	Endogenous	6367.47	18899.7	18073.8	17167.8	870.11	153.73	25230.6	253.34	136.78	2032.76	2677.64	1495.93	393.67	4348.46	14637.3
S100a9	Endogenous	3763.24	7144.19	8704.74	10490.7	362.06	37.21	16984.2	90.69	46.19	1041.14	1320.43	864.67	144.2	2343.53	7785.96
Sele	Endogenous	14.08	11.14	12.9	16.45	18.69	18.6	11.93	7.89	24.87	18.43	6.49	19.08	8.85	18.2	17.38
Sell	Endogenous	48.49	90.22	26.97	24.19	57.23	21.54	58.67	35.49	40.86	97.89	50.83	99.83	49.54	61.9	50.21
Selplg	Endogenous	3.13	3.34	1	3.87	5.84	3.92	6.96	3.94	5.33	6.91	8.65	5.87	6.19	7.28	7.72
Serping1	Endogenous	1549.25	3295.86	1566.1	1013.17	1413.2	764.74	1633.78	1251.9	2300.47	1758.65	801.34	1616.31	977.54	1195.43	830.35
Sh2d1a	Endogenous	6.26	16.71	9.97	8.71	9.34	8.81	13.92	8.87	15.99	11.52	12.98	8.81	7.08	19.42	15.45
Sigirr	Endogenous	17.21	26.73	17	15.48	15.18	12.73	15.91	17.74	15.99	8.06	36.77	35.23	26.54	14.56	21.24
Ski	Endogenous	552.13	318.56	340.07	349.34	376.08	287.88	416.65	591.45	808.27	697.93	529.9	522.62	423.75	601.96	465.38
Slamf1	Endogenous	14.08	20.05	5.86	11.61	17.52	6.85	6.96	4.93	19.54	17.28	7.57	16.15	11.5	10.92	13.52
Slamf7	Endogenous	51.62	72.4	51.6	58.06	80.59	64.63	84.52	56.19	39.08	32.25	49.75	39.64	34.5	55.83	59.86
Smad3	Endogenous	401.19	356.43	268.54	256.44	339.87	217.38	250.59	510.62	651.95	726.73	459.61	741.36	414.02	518.22	476.97
Smad5	Endogenous	746.08	1016.94	728.23	572.87	699.59	676.62	670.22	853.66	1104.94	1050.35	899.75	1253.7	824.49	1197.86	1179.87
Socs1	Endogenous	112.62	114.73	127.82	162.57	116.79	101.84	232.69	69	99.48	76.01	120.04	69	74.31	77.67	108.14
Socs3	Endogenous	111.83	134.78	90.88	100.64	74.75	68.54	108.39	85.76	136.78	126.69	133.02	130.66	86.7	194.18	88.83
Spn	Endogenous	51.62	43.44	49.25	38.71	63.07	37.21	66.62	20.7	39.08	33.4	46.5	26.42	33.62	48.55	52.14
Src	Endogenous	390.24	295.17	311.34	265.15	280.3	235.98	441.51	463.3	591.55	555.12	489.89	764.85	366.24	571.62	465.38
Stat1	Endogenous	243.22	270.66	245.67	270.95	162.34	182.13	376.87	232.64	254.03	205	234.67	234.89	251.24	439.34	191.17
Stat2	Endogenous	37.54	44.55	26.39	30.97	36.21	23.5	52.7	57.17	37.3	67.95	77.86	108.63	87.58	106.8	69.52
Stat3	Endogenous	1460.09	719.54	1293.46	1472.82	951.87	886.16	1779.96	1013.35	993.02	1151.7	1126.86	1272.79	817.42	1223.35	1071.73
Stat4	Endogenous	13.29	18.94	9.97	17.42	17.52	14.69	16.9	13.8	31.98	21.88	14.06	14.68	15.04	24.27	15.45
Stat5a	Endogenous	177.53	228.34	185.28	196.44	200.88	153.73	176.01	180.39	229.16	193.49	210.88	265.71	134.47	252.44	247.17
Stat5b	Endogenous	301.09	374.25	261.51	262.24	266.29	262.42	293.34	310.51	417.46	340.9	368.77	447.75	303.43	366.52	364.97
Stat6	Endogenous	531.01	493.43	412.19	481.91	408.78	441.61	531	440.63	481.41	452.62	525.58	503.54	444.98	524.29	471.17
Syk	Endogenous	144.68	161.51	100.85	108.38	141.32	110.65	148.16	138	177.64	160.09	189.25	227.55	187.55	161.41	146.76
Tagap	Endogenous	27.37	35.64	18.18	21.29	44.38	19.58	38.78	29.57	65.73	48.37	32.44	91.02	31.85	52.19	61.79
Tal1	Endogenous	22.68	25.62	24.04	19.35	25.69	21.54	28.84	19.71	37.3	20.73	22.71	33.76	19.46	27.91	32.83
Tap1	Endogenous	306.56	242.82	313.69	548.68	320.01	341.74	525.04	265.17	229.16	205	376.34	249.57	239.74	425.99	280
Tapbp	Endogenous	331.59	295.17	313.1	359.98	395.93	344.67	538.96	299.67	326.86	289.08	340.65	261.31	264.51	337.39	314.76
Tbk1	Endogenous	136.08	169.3	119.61	96.77	141.32	113.59	136.23	139.98	172.31	172.76	187.09	265.71	176.05	230.59	177.66
Tbx21	Endogenous	4.69	12.25	4.1	10.64	12.85	2.94	4.97	11.83	14.21	5.76	4.33	13.21	9.73	10.92	15.45
Tcf4	Endogenous	855.57	558.04	612.72	442.23	859.6	434.76	816.39	959.13	1207.97	1050.35	752.68	1384.36	825.38	1239.12	1143.18
Tcf7	Endogenous	167.36	80.2	101.44	131.61	122.63	131.21	141.2	146.88	135.01	165.85	135.18	86.61	142.43	114.08	117.79
Tfrc	Endogenous	429.35	959.02	518.32	452.88	451.99	471.97	476.31	293.75	156.33	234.95	461.77	259.84	456.48	286.42	403.59
Tgfb1	Endogenous	685.08	1383.39	768.1	587.39	648.2	376.01	642.37	600.32	746.1	758.97	582.89	670.89	460.9	567.98	527.17
Tgfb2	Endogenous	162.67	120.3	121.96	153.86	156.5	85.19	214.79	205.04	277.12	289.08	160.05	352.33	131.81	237.87	256.83
Tgfb3	Endogenous	165.8	142.57	168.86	167.41	162.34	99.88	195.89	244.46	243.37	236.1	204.39	280.4	190.2	286.42	245.24
Tgfbi	Endogenous	5509.56	3246.85	3001.45	3063.7	5343.3	1762.54	7070.1	3347.59	7237.17	6465.67	2825.79	7199.25	2224.01	4763.53	3796.43
Tgfbr1	Endogenous	303.44	316.33	263.85	226.44	237.09	208.57	310.25	255.31	351.73	304.05	303.88	436.01	321.13	390.79	388.14
Tgfbr2	Endogenous	1808.89	1290.94	1148.63	1007.36	1184.29	697.18	2059.38	2052.32	2591.81	2425.49	1468.59	2872.95	1277.43	2163.92	1836.42
Thy1	Endogenous	1945.75	1391.19	1508.64	1586.04	1319.77	1320.92	1515.45	2152.87	1890.12	2179.03	1175.52	712	1401.28	974.55	1064
Tigit	Endogenous	17.99	12.25	7.62	11.61	24.53	6.85	17.9	9.86	21.32	13.82	9.73	13.21	3.54	10.92	23.17
Tirap	Endogenous	83.68	75.74	59.81	69.67	74.75	49.94	65.63	84.77	127.9	103.65	57.32	92.49	76.96	100.73	110.07
Tlr1	Endogenous	63.35	108.04	43.39	42.58	51.39	24.48	64.64	51.26	79.94	92.14	68.13	107.17	81.39	72.82	84.97
Tlr2	Endogenous	33.63	55.69	32.25	45.48	29.2	33.29	40.77	43.37	67.5	44.92	46.5	44.04	38.04	50.97	63.72
Tlr3	Endogenous	71.17	37.87	43.39	62.9	72.41	34.27	75.57	79.85	99.48	63.34	65.97	115.97	46	89.81	79.17
Tlr4	Endogenous	161.88	187.13	118.44	129.67	142.49	110.65	219.76	168.56	206.07	181.97	162.22	192.31	154.81	190.54	181.52
Tlr5	Endogenous	33.63	41.21	21.69	21.29	46.72	37.21	33.81	35.49	53.29	39.16	28.12	38.17	40.69	36.41	46.35
Tlr8	Endogenous	122.78	75.74	62.74	76.45	98.11	62.67	107.39	70.97	113.69	103.65	68.13	108.63	96.43	72.82	73.38
Tlr9	Endogenous	43.79	45.67	22.87	32.9	42.05	29.38	37.79	40.42	67.5	49.52	35.69	45.51	31.85	35.2	36.69
Tmem173	Endogenous	110.27	184.9	117.85	98.7	112.12	70.5	111.37	96.6	106.59	141.66	88.68	126.25	85.81	78.89	98.48
Tnf	Endogenous	29.72	50.12	29.9	25.16	24.53	17.63	36.79	20.7	21.32	24.19	30.28	24.96	32.73	32.77	27.03
Tnfaip3	Endogenous	72.73	83.54	67.43	73.54	65.4	57.77	67.62	48.3	49.74	46.07	65.97	49.91	60.16	59.47	83.03
Tnfaip6	Endogenous	508.33	399.87	333.04	207.09	313.01	242.84	503.16	484	689.25	639.2	325.51	507.94	387.48	495.16	616
Tnfrsf11a	Endogenous	32.85	24.5	20.52	26.13	30.37	25.46	51.71	35.49	37.3	43.76	57.32	61.66	41.58	37.62	32.83
Tnfrsf13b	Endogenous	22.68	23.39	17	22.26	24.53	27.42	16.9	26.62	35.53	18.43	23.79	27.89	13.27	20.63	27.03
Tnfrsf13c	Endogenous	10.95	20.05	9.38	12.58	11.68	9.79	11.93	12.81	14.21	14.97	14.06	14.68	14.15	18.2	25.1
Tnfrsf14	Endogenous	152.5	197.15	167.69	163.54	112.12	71.48	186.95	308.54	403.25	421.52	290.91	494.73	225.59	438.12	324.42
Tnfrsf17	Endogenous	18.77	16.71	14.66	17.42	12.85	8.81	15.91	14.79	19.54	14.97	15.14	14.68	16.81	6.07	17.38
Tnfrsf1b	Endogenous	146.24	274.01	138.96	147.09	107.45	86.17	179.98	176.45	204.29	316.72	144.91	230.48	170.74	156.56	185.38
Tnfrsf4	Endogenous	44.58	73.51	53.94	42.58	59.56	41.13	73.58	21.69	10.66	19.58	36.77	5.87	21.23	24.27	42.48
Tnfrsf8	Endogenous	7.82	10.02	9.97	14.52	21.02	8.81	21.88	8.87	15.99	6.91	8.65	13.21	13.27	8.5	28.97
Tnfrsf9	Endogenous	5.47	11.14	6.45	7.74	4.67	5.88	6.96	3.94	7.11	9.21	7.57	5.87	5.31	7.28	13.52
Tnfsf10	Endogenous	21.12	21.16	19.94	38.71	31.53	28.4	43.75	18.73	31.98	27.64	27.04	26.42	26.54	20.63	36.69
Tnfsf11	Endogenous	9.38	14.48	9.97	9.68	17.52	8.81	20.88	15.77	12.43	11.52	4.33	17.62	12.39	4.85	7.72
Tnfsf12	Endogenous	215.06	52.35	93.81	111.28	193.88	84.21	225.73	237.56	317.98	248.77	193.58	221.67	176.05	195.4	179.59
Tnfsf13b	Endogenous	13.29	17.82	14.66	12.58	15.18	9.79	16.9	13.8	26.65	14.97	16.22	13.21	10.62	16.99	9.66
Tnfsf14	Endogenous	29.72	27.85	14.07	22.26	32.7	21.54	30.83	15.77	47.96	28.79	32.44	32.3	25.65	41.26	48.28
Tnfsf15	Endogenous	7.04	12.25	9.38	16.45	24.53	15.67	12.93	13.8	12.43	9.21	10.81	11.74	16.81	12.14	13.52
Tnfsf18	Endogenous	25.03	22.28	14.07	19.35	15.18	12.73	21.88	12.81	19.54	10.37	10.81	8.81	9.73	14.56	17.38
Tnfsf8	Endogenous	8.6	16.71	7.62	5.81	24.53	4.9	18.89	6.9	17.76	14.97	11.9	22.02	16.81	15.78	13.52
Tollip	Endogenous	711.67	701.72	715.92	723.83	604.99	680.53	760.71	531.32	634.18	573.55	726.72	734.02	510.44	656.58	612.14
Traf1	Endogenous	24.24	40.1	19.35	30	26.86	28.4	25.85	20.7	21.32	23.03	18.38	14.68	30.96	26.7	28.97
Traf2	Endogenous	83.68	54.58	67.43	98.7	51.39	72.46	71.6	79.85	110.14	90.98	73.54	105.7	92.89	92.24	77.24
Traf3	Endogenous	168.92	138.12	150.69	137.41	153	141.98	168.05	197.15	259.36	221.13	236.83	299.48	236.2	228.16	216.28
Traf4	Endogenous	76.64	74.63	51.6	55.16	103.95	58.75	70.6	78.86	126.13	124.38	120.04	212.87	81.39	166.27	140.97
Traf5	Endogenous	132.95	163.73	138.96	126.77	116.79	116.52	113.36	126.18	179.42	160.09	193.58	208.46	151.27	196.61	237.52
Traf6	Endogenous	155.63	179.33	153.03	170.31	142.49	139.04	157.11	112.38	133.23	107.11	125.45	105.7	102.62	116.51	83.03
Trem1	Endogenous	10.95	15.59	2.93	7.74	10.51	11.75	25.85	4.93	14.21	8.06	9.73	16.15	10.62	13.35	11.59
Trem2	Endogenous	114.18	99.13	70.36	106.45	75.92	48.96	117.34	116.32	129.68	143.96	123.28	170.29	126.5	142	146.76
Trp53	Endogenous	270.59	369.8	360.01	247.73	297.82	209.55	197.88	373.6	520.49	556.27	299.56	415.45	274.24	327.68	307.04
Tslp	Endogenous	48.49	158.17	75.05	31.93	19.85	22.52	26.85	10.84	26.65	12.67	73.54	39.64	19.46	29.13	48.28
Tyk2	Endogenous	65.69	86.88	61.57	48.38	51.39	41.13	26.85	64.07	74.61	52.98	80.03	117.44	76.08	78.89	63.72
Tyrobp	Endogenous	834.45	1766.56	931.1	1004.46	982.23	725.58	1254.92	816.2	1046.32	1397.02	977.62	1630.99	985.5	1202.71	1235.87
Ube2l3	Endogenous	500.51	448.88	414.54	450.94	478.85	435.74	429.58	555.96	678.6	632.29	483.4	651.81	483.02	569.2	475.04
Vcam1	Endogenous	50.05	46.78	36.94	42.58	31.53	16.65	65.63	55.2	115.47	117.47	25.95	39.64	46	42.48	65.66
Vtn	Endogenous	8.6	13.37	10.55	10.64	15.18	10.77	37.79	14.79	46.19	39.16	8.65	19.08	7.08	9.71	15.45
Xbp1	Endogenous	1234.08	1211.86	894.75	894.14	846.75	818.6	1042.12	875.34	1048.09	987.01	896.51	1027.63	786.45	881.1	955.87
Xcl1	Endogenous	24.24	43.44	24.04	60	43.21	53.86	63.64	26.62	28.42	28.79	35.69	33.76	33.62	33.98	44.41
Xcr1	Endogenous	15.64	16.71	6.45	10.64	17.52	8.81	13.92	13.8	12.43	9.21	9.73	7.34	16.81	15.78	11.59
Zap70	Endogenous	7.82	31.19	11.73	25.16	21.02	25.46	14.92	15.77	19.54	11.52	24.87	17.62	6.19	15.78	27.03
Zbtb7b	Endogenous	251.82	353.09	257.99	324.18	289.65	366.22	184.96	214.89	209.62	289.08	267.11	361.14	246.82	252.44	185.38
Zeb1	Endogenous	730.44	368.68	453.24	311.6	505.72	197.8	684.14	899	1342.98	1028.47	1058.73	2024.42	817.42	1804.68	1436.7
Alas1	Housekeeping	143.12	177.1	157.72	154.83	171.69	145.9	148.16	136.03	147.44	188.88	160.05	158.55	149.51	152.92	137.1
Eef1g	Housekeeping	2046.63	1844.52	2350.03	2436.64	2490.04	2703.54	2212.51	2031.62	1909.66	1876.13	2140.16	1965.7	2259.39	2086.24	2280.56
G6pdx	Housekeeping	444.21	119.18	352.97	397.72	317.68	436.72	392.78	371.63	239.82	216.52	340.65	311.22	374.21	268.21	179.59
Gapdh	Housekeeping	8109.1	5413.28	8324.8	9588.83	9734.74	10645.7	7362.45	6652.8	5096.57	5683.66	8754.22	7611.77	6903.8	5228.35	6005.54
Gusb	Housekeeping	331.59	180.44	204.63	245.79	262.79	201.71	405.71	351.91	410.35	415.77	298.48	305.35	297.24	302.2	380.42
Hprt	Housekeeping	151.72	203.83	172.38	172.25	110.95	142.96	166.06	149.83	156.33	168.15	129.77	165.89	151.27	155.35	156.41
Oaz1	Housekeeping	3615.43	3882.86	3810.01	3262.08	3090.36	3068.77	3619.57	4064.23	4656.02	4400.67	3879.11	4669.83	3475.78	4667.65	4713.67
Polr1b	Housekeeping	49.27	75.74	48.67	49.35	72.41	47.98	40.77	71.96	71.06	59.89	68.13	58.72	76.96	77.67	59.86
Polr2a	Housekeeping	570.9	399.87	430.37	468.36	664.56	539.53	486.26	650.59	708.79	613.86	446.63	515.28	479.48	468.46	405.52
Ppia	Housekeeping	5325.78	6272.05	6140.11	5761.62	4912.34	5600.95	6250.73	5080.53	5251.12	5133.15	5020.03	5700.39	5184.93	6519.66	7395.89
Rpl19	Housekeeping	10059.5	16345.6	13670.4	11381	9721.89	11054	11835.2	8830.31	8136.04	7924.88	8866.69	7868.68	9388.78	9278.26	11130.5
Sdha	Housekeeping	574.81	328.58	435.06	507.07	433.3	522.89	572.77	506.67	490.29	499.84	511.52	438.94	460.9	429.63	386.21
Tbp	Housekeeping	135.3	106.93	98.5	97.74	107.45	98.9	125.29	128.15	138.56	137.05	145.99	139.46	150.39	133.5	142.9
Tubb5	Housekeeping	1471.04	4468.74	2377.01	1566.69	1876.87	1237.69	1027.2	2354.95	3613.25	3877.79	1682.71	2523.56	1393.32	1912.69	1923.32
NEG_A	Negative	16	20	20	16	16	17	8	15	15	15	12	10	16	19	12
NEG_B	Negative	12	7	12	10	6	6	9	7	3	11	12	8	13	8	10
NEG_C	Negative	36	32	24	28	25	19	25	24	19	32	28	25	23	28	17
NEG_D	Negative	16	18	7	18	17	16	15	18	23	17	24	16	17	20	9
NEG_E	Negative	20	21	13	20	23	19	9	24	19	18	20	16	16	19	14
NEG_F	Negative	22	28	24	25	38	24	25	16	26	25	31	28	25	24	19
NEG_G	Negative	20	26	20	18	28	19	21	24	20	23	16	17	27	23	18
NEG_H	Negative	19	31	14	15	30	17	16	17	23	18	20	13	31	21	18
POS_A	Positive	56363	58036	48125	48663	47824	42623	37581	53279	49732	57872	50452	42587	41738	45126	41476
POS_B	Positive	17792	18314	15448	14896	16936	15516	13661	16711	15221	18208	17359	15187	14548	16233	14456
POS_C	Positive	5349	5566	4540	4683	5428	4758	4086	5090	4627	5531	5368	4696	4563	5101	4441
POS_D	Positive	1245	1277	1074	1046	1186	1006	882	1159	1076	1234	1227	1015	1051	1134	978
POS_E	Positive	246	277	209	239	218	220	185	191	213	285	224	198	215	204	227
POS_F	Positive	94	99	86	89	96	68	79	90	96	86	75	71	84	65	72

## Sheet: KO vs. WT_ImmunologyPanel
Gene	Test Type	P-value	Adj. P-value	Median 1. group	Median 2. group	Fold Changes	Log2 FC
Il13ra1	t.test	1.12634e-06	0.000616109	8.07446	9.75631	0.36263	-1.46343
Traf3	t.test	2.83308e-06	0.000774847	7.85888	7.23544	1.56056	0.64206
Rae1	t.test	5.04421e-05	0.00689796	8.68882	8.20618	1.45805	0.54404
Cd109	t.test	4.5254e-05	0.00689796	8.75442	9.36862	0.631226	-0.663771
Zeb1	t.test	0.000356966	0.009149	10.2197	8.82413	2.90494	1.53851
Traf6	t.test	9.19586e-05	0.009149	6.7776	7.28198	0.703082	-0.508234
Tnfrsf14	t.test	0.000184879	0.009149	8.49862	7.3535	2.4661	1.30223
Smad3	t.test	0.000107207	0.009149	9.00676	8.06899	1.88337	0.913316
Psmb5	wilcox.test	0.0003108	0.009149	9.27215	9.50166	0.799414	-0.322985
Notch1	t.test	0.000151735	0.009149	9.56043	8.87744	1.54833	0.630717
Il1rn	t.test	0.000153095	0.009149	6.09928	8.16053	0.262894	-1.92745
Il1rl2	wilcox.test	0.0003108	0.009149	7.60752	7.94345	0.69916	-0.516306
Il1a	t.test	0.000248175	0.009149	5.05489	6.00293	0.489963	-1.02926
Ifit2	t.test	0.000367967	0.009149	7.69834	6.08194	2.76066	1.46501
H2.Ab1	t.test	0.000123056	0.009149	10.8248	11.6457	0.576027	-0.795792
H2.Aa	t.test	0.000329742	0.009149	11.3028	11.9613	0.593153	-0.753524
Fyn	wilcox.test	0.0003108	0.009149	9.6477	8.93475	1.80815	0.854517
Cul9	wilcox.test	0.0003108	0.009149	6.38037	5.8089	1.81783	0.862216
Cd59b	t.test	0.000339176	0.009149	4.49824	3.22959	2.24805	1.16867
Casp2	t.test	0.000244891	0.009149	7.25346	6.69975	1.45019	0.536246
Arhgdib	t.test	0.000174565	0.009149	9.63692	10.4443	0.633021	-0.659675
Abl1	t.test	0.000247871	0.009149	7.98807	7.16209	1.79839	0.846702
Defb1	t.test	0.000421694	0.010029	6.21612	9.05327	0.188259	-2.40921
C1qbp	t.test	0.000479491	0.0109284	8.97933	9.24034	0.832564	-0.264368
Src	t.test	0.000525651	0.0115013	9.02648	8.2054	1.6832	0.751208
Stat2	t.test	0.000583927	0.0121065	6.20108	5.17832	2.09708	1.06838
Mx1	t.test	0.000597577	0.0121065	7.15756	5.57682	2.85444	1.51321
Pdgfb	t.test	0.000756034	0.0143037	9.35872	8.1576	2.38702	1.25521
Ccl22	t.test	0.00075833	0.0143037	6.14253	7.25219	0.373415	-1.42115
Map4k4	t.test	0.000856365	0.0156144	10.5984	9.54495	1.9082	0.932214
Cd164	t.test	0.000891164	0.0157247	10.0724	10.3577	0.822612	-0.281716
Tgfb3	t.test	0.000952138	0.0157824	7.93023	7.3733	1.54669	0.629185
Ccl20	t.test	0.00092492	0.0157824	5.01376	5.92434	0.484201	-1.04632
Ctnnb1	t.test	0.000994654	0.0160022	11.7912	11.2914	1.43279	0.518823
Phlpp2	t.test	0.0010471	0.0163647	6.64925	5.94416	1.56461	0.6458
Il2ra	t.test	0.00116039	0.0167035	4.62965	5.97888	0.44406	-1.17117
Cd9	t.test	0.00112998	0.0167035	11.3968	12.0947	0.594752	-0.74964
Cd74	t.test	0.00114876	0.0167035	11.6896	12.7092	0.581364	-0.782487
Ccl8	t.test	0.0012072	0.0169318	9.97349	11.3757	0.447053	-1.16148
Traf4	t.test	0.00142925	0.0169957	6.96869	6.1416	1.82963	0.871556
Smad5	t.test	0.00132437	0.0169957	10.0732	9.45037	1.43528	0.521329
Irak1	t.test	0.00136396	0.0169957	7.68035	7.10234	1.42836	0.514363
Ilf3	t.test	0.0014096	0.0169957	7.37067	6.74752	1.55485	0.636777
H2.DMb2	t.test	0.00137887	0.0169957	5.49403	6.32769	0.603137	-0.729443
Fn1	t.test	0.00127628	0.0169957	11.6582	10.9474	1.92266	0.943107
Ets1	t.test	0.0013188	0.0169957	10.4424	9.69127	1.94012	0.956146
Ski	t.test	0.00175803	0.0184931	9.12884	8.44849	1.53908	0.622064
Ltbr	t.test	0.0016487	0.0184931	9.25016	8.82088	1.32835	0.409633
Gata3	t.test	0.00173922	0.0184931	6.55755	8.85695	0.26023	-1.94214
Ccrl1	t.test	0.00159861	0.0184931	4.82009	7.2076	0.236131	-2.08234
Ccl25	t.test	0.00175433	0.0184931	5.71836	4.87676	1.69091	0.757801
Ccl19	t.test	0.00175137	0.0184931	5.94476	7.32481	0.400476	-1.32021
Tbk1	t.test	0.00200107	0.0206525	7.46641	7.08831	1.45344	0.539469
Tnfrsf4	t.test	0.00233875	0.0208305	4.4235	5.75328	0.36146	-1.46809
Npc1	t.test	0.00220185	0.0208305	9.25601	8.97177	1.1868	0.247079
Ncam1	t.test	0.00220562	0.0208305	10.6456	9.32915	2.44689	1.29095
Masp1	t.test	0.00225848	0.0208305	4.56764	5.32733	0.59637	-0.745719
Il16	wilcox.test	0.0021756	0.0208305	7.34592	6.71987	1.87316	0.905477
Ikbkb	t.test	0.0021824	0.0208305	7.5927	6.89639	1.65347	0.7255
Defb14	t.test	0.00235086	0.0208305	5.36134	8.38435	0.195224	-2.3568
Cd7	t.test	0.00227986	0.0208305	3.97115	4.99186	0.441695	-1.17888
Cd2	t.test	0.00239913	0.0208305	5.00291	5.8107	0.536536	-0.898254
Bcl2	t.test	0.00239903	0.0208305	7.15964	6.27724	1.74783	0.805569
Traf5	t.test	0.00258321	0.0220784	7.54199	6.98607	1.38512	0.470009
Il17re	t.test	0.00269578	0.022686	4.7543	5.70764	0.506499	-0.98137
Ifnar1	t.test	0.00279115	0.0228533	9.38308	8.78054	1.52858	0.612188
Adal	t.test	0.00279921	0.0228533	6.38938	5.95257	1.42136	0.507277
Ube2l3	t.test	0.0030641	0.0242907	9.13581	8.81019	1.24544	0.316659
Il18	t.test	0.00306196	0.0242907	5.33269	6.82388	0.30102	-1.73207
Tcf4	t.test	0.00323889	0.0249531	10.0977	9.25908	1.6669	0.737163
Il10rb	t.test	0.00321078	0.0249531	9.48525	8.59831	1.6006	0.678614
Il1r2	t.test	0.00341684	0.0259585	5.50324	7.4591	0.319171	-1.6476
Mapk11	t.test	0.00348087	0.0260827	4.89688	4.31759	1.44411	0.530183
Ciita	t.test	0.00354387	0.0261959	5.78078	6.37955	0.580929	-0.783566
Runx1	t.test	0.00370378	0.0268025	7.9188	8.41714	0.761319	-0.393427
Il12rb2	wilcox.test	0.0037296	0.0268025	3.35786	4.89869	0.369665	-1.43571
Cd99	t.test	0.00377292	0.0268025	9.96665	9.40348	1.64254	0.715931
Psmc2	t.test	0.00404755	0.0283847	10.3112	10.4604	0.852264	-0.230627
Pml	t.test	0.00421236	0.0291666	7.71551	7.28355	1.60982	0.686897
Itgb1	t.test	0.00465449	0.0318251	12.5406	11.9146	1.53948	0.62244
Runx3	t.test	0.00478094	0.0322861	4.04101	4.85	0.605354	-0.724149
Irf3	t.test	0.00484922	0.0323478	5.48667	5.07938	1.48876	0.574107
Csf2	t.test	0.00509136	0.0330557	3.403	2.79909	1.53627	0.61943
Cd3e	t.test	0.00509405	0.0330557	3.98685	5.37886	0.351918	-1.50669
B2m	t.test	0.00513662	0.0330557	13.2784	13.6765	0.677602	-0.561489
Cx3cr1	t.test	0.00552495	0.0349832	8.26653	6.93711	2.32238	1.21561
Bax	t.test	0.00556406	0.0349832	8.11604	7.32769	1.53698	0.620096
Socs1	t.test	0.00588009	0.0365501	6.2637	6.86777	0.637428	-0.649665
Slamf7	t.test	0.006106	0.0371109	5.47275	6.01413	0.688035	-0.539446
Itga5	t.test	0.00607853	0.0371109	7.68003	7.0863	1.47725	0.562912
Cradd	wilcox.test	0.00648826	0.0390009	6.31894	5.78555	1.48399	0.569481
Ikbkap	t.test	0.00684314	0.0406869	7.69959	7.14241	1.5034	0.58823
Abcf1	t.test	0.00746477	0.0439057	8.12763	7.8645	1.22032	0.287264
Syk	t.test	0.00794767	0.0457618	7.4037	7.14282	1.33089	0.412388
Il18r1	t.test	0.00789346	0.0457618	5.41672	6.4138	0.524919	-0.929833
Trem2	t.test	0.00861106	0.0490651	7.08428	6.63125	1.57292	0.653446
Tgfb2	t.test	0.00884822	0.0495635	7.94935	7.26547	1.63345	0.707925
Tfrc	wilcox.test	0.00932401	0.0495635	8.18022	8.88255	0.583642	-0.776843
Stat5b	wilcox.test	0.00932401	0.0495635	8.51469	8.05685	1.26424	0.338274
Phlpp1	t.test	0.0093328	0.0495635	7.80868	7.38724	1.26398	0.337979
Cebpb	wilcox.test	0.00932401	0.0495635	8.52173	9.55221	0.564971	-0.823752
Cd24a	t.test	0.00890757	0.0495635	7.85985	8.85723	0.503803	-0.989068
Ccr4	t.test	0.00925944	0.0495635	4.15115	4.87381	0.579314	-0.787582
Nfatc2	t.test	0.00979023	0.0508834	9.47181	8.4872	2.3433	1.22854
Icos	t.test	0.00973501	0.0508834	4.67995	5.63923	0.500687	-0.998018
Atg16l1	t.test	0.0098604	0.0508834	7.94404	7.1814	1.46599	0.551876
Il7r	t.test	0.0108266	0.0553471	5.65691	6.23802	0.64096	-0.641695
Ptk2	t.test	0.0110621	0.0560274	9.12922	8.44721	1.51159	0.596069
Mme	t.test	0.012149	0.0594246	6.05688	6.59902	0.617558	-0.695353
Ltb4r2	t.test	0.0122103	0.0594246	5.11733	5.63923	0.689361	-0.536669
Ltb	t.test	0.012276	0.0594246	5.01376	5.53356	0.653924	-0.612804
Lif	t.test	0.012261	0.0594246	6.02724	5.20046	1.77598	0.828612
Cd44	t.test	0.0120652	0.0594246	9.91317	10.4723	0.649994	-0.621501
Casp3	t.test	0.01261	0.0605061	8.23225	7.7664	1.25045	0.322443
Fadd	t.test	0.0129184	0.0614468	6.15551	5.58436	1.35485	0.438133
Tgfbr1	t.test	0.0131324	0.0619261	8.39267	8.04357	1.28862	0.365829
Cd8b1	t.test	0.0133295	0.0623184	3.95155	2.95233	1.77092	0.824495
Tnfrsf13c	wilcox.test	0.013986	0.0627078	3.85231	3.54597	1.30842	0.387825
Prdm1	wilcox.test	0.013986	0.0627078	6.31005	7.57463	0.531001	-0.913213
Il2rb	wilcox.test	0.013986	0.0627078	5.57198	6.33253	0.580929	-0.783567
Cish	wilcox.test	0.013986	0.0627078	5.03094	5.58195	0.743834	-0.426948
Batf3	wilcox.test	0.013986	0.0627078	5.43646	4.34483	1.77068	0.824302
Mif	t.test	0.0141263	0.0628217	9.41264	9.87896	0.697209	-0.520337
Cxcl11	t.test	0.0143222	0.0631794	3.9741	3.10434	1.89602	0.922972
Tirap	t.test	0.0149772	0.0641645	6.59279	6.12247	1.35875	0.442279
Tgfbr2	t.test	0.0147357	0.0641645	11.0412	10.2098	1.62396	0.699515
Tagap	t.test	0.015132	0.0641645	5.65087	4.77452	1.73127	0.791832
Map4k2	t.test	0.0150182	0.0641645	6.65692	6.11249	1.32143	0.402101
Igf2r	t.test	0.0148152	0.0641645	7.98399	7.56491	1.20258	0.266128
Ltb4r1	t.test	0.0159178	0.0669771	5.7496	6.2521	0.651812	-0.617472
Pparg	t.test	0.0165285	0.0684933	4.97866	5.89336	0.605491	-0.723823
C4a	t.test	0.016509	0.0684933	11.4025	10.3071	1.75627	0.812519
Ddx58	t.test	0.0166667	0.0685466	7.68061	7.23802	1.39142	0.47656
Jak1	t.test	0.0170249	0.0694973	10.4255	10.1024	1.24853	0.320225
Muc1	t.test	0.0175213	0.0709936	4.98884	4.51538	1.52131	0.605311
Tnfrsf11a	t.test	0.0182513	0.0734079	5.30562	4.70764	1.46322	0.549142
H2.Eb1	t.test	0.018654	0.0744798	10.1322	10.5445	0.792758	-0.335048
Il33	t.test	0.0202233	0.0801606	7.01554	8.32328	0.512264	-0.965041
H2.K1	t.test	0.0210344	0.0827756	9.15472	10.0935	0.597402	-0.743226
Tnfsf18	t.test	0.0215145	0.0834836	3.55675	4.27426	0.691565	-0.532063
Cd46	t.test	0.0215195	0.0834836	4.42264	3.55459	1.66599	0.736382
Lair1	t.test	0.0221282	0.0852403	5.67324	5.10978	1.45072	0.536768
Ccr3	t.test	0.022709	0.0868659	5.85779	4.74739	2.24485	1.16662
Ifnar2	t.test	0.0233029	0.0885187	8.74352	7.91277	1.56032	0.641846
Cxcr6	t.test	0.0238942	0.0901389	4.93173	5.92979	0.578392	-0.78988
Cd81	t.test	0.0242942	0.0910201	12.2671	11.7524	1.53353	0.616853
Nfatc1	t.test	0.026617	0.0977304	7.12396	6.8089	1.19109	0.252277
Il27ra	t.test	0.0266213	0.0977304	5.63372	5.03122	1.49793	0.582975
Icam1	t.test	0.0262915	0.0977304	5.74627	6.01123	0.729065	-0.455881
Rag1	t.test	0.0274322	0.100036	3.70138	3.13914	1.45933	0.545305
Psmb7	t.test	0.0291992	0.103714	9.52761	9.92787	0.787456	-0.34473
Clu	wilcox.test	0.0289044	0.103714	8.7288	9.31381	0.51173	-0.966545
Chuk	wilcox.test	0.0289044	0.103714	8.4204	7.81845	1.37235	0.456652
Cd3d	t.test	0.0290607	0.103714	5.52405	6.06113	0.694877	-0.52517
Il25	t.test	0.0304899	0.10691	3.66998	3.22959	1.51403	0.598394
Abcb10	t.test	0.0303199	0.10691	6.89396	6.65306	1.17113	0.227906
Tnfaip6	t.test	0.031072	0.108257	8.97013	8.37955	1.47815	0.563793
Trp53	t.test	0.031907	0.109082	8.45075	8.07996	1.36972	0.453886
Il1rap	t.test	0.0317133	0.109082	10.6247	10.1949	1.49185	0.577101
Il19	t.test	0.0315138	0.109082	4.21116	6.27463	0.248632	-2.00792
Traf2	t.test	0.0327395	0.110044	6.5174	6.16189	1.28147	0.357804
Il10ra	t.test	0.032564	0.110044	6.42845	6.14241	1.31793	0.398276
Cd82	t.test	0.032792	0.110044	7.78267	8.61394	0.642898	-0.637339
Tnfaip3	t.test	0.0334808	0.111671	5.76767	6.07938	0.819219	-0.287679
Il6ra	t.test	0.0348169	0.115423	7.27872	7.75909	0.70846	-0.497242
Tnfsf12	t.test	0.0358018	0.117973	7.70128	6.79805	1.76289	0.817944
Tlr2	t.test	0.036224	0.118041	5.51422	5.07168	1.29885	0.377236
Hif1a	t.test	0.036254	0.118041	8.55615	8.80268	0.833114	-0.263414
Cxcr2	t.test	0.0368635	0.119315	4.26673	5.59962	0.474667	-1.07501
Rag2	t.test	0.0372171	0.119752	3.2142	2.45154	1.60846	0.685684
Klra1	t.test	0.0380345	0.121666	3.81266	2.99277	1.62068	0.6966
Blnk	t.test	0.0392199	0.124728	6.38336	7.0899	0.671244	-0.57509
Lck	wilcox.test	0.0400932	0.126769	4.96497	5.58436	0.600909	-0.734781
Bcl6	t.test	0.0405177	0.127375	6.4283	6.77703	0.774922	-0.367876
Ccr7	t.test	0.0411508	0.128626	4.202	4.85947	0.612076	-0.708217
Tollip	t.test	0.0453393	0.140124	9.28323	9.47506	0.884207	-0.177544
Nfkbiz	t.test	0.0455451	0.140124	8.30696	7.92416	1.42671	0.512687
Btla	t.test	0.045598	0.140124	5.25134	5.8387	0.664039	-0.590661
C8g	t.test	0.0471132	0.143972	4.08236	3.61471	1.36974	0.453901
Nos2	t.test	0.0475688	0.144556	4.22012	3.95233	1.5415	0.624335
Selplg	t.test	0.0481616	0.145549	2.70931	1.95233	1.80681	0.853444
Ccl2	t.test	0.0484582	0.145641	9.18893	8.04412	1.70661	0.771136
Prim1	t.test	0.0489038	0.146177	7.60129	7.44444	1.23066	0.29943
Spn	t.test	0.0504149	0.149433	5.1798	5.62205	0.736356	-0.441525
Ifi35	t.test	0.0505394	0.149433	7.44241	7.67878	0.796299	-0.328617
Tyk2	t.test	0.0514544	0.150755	6.23537	5.68342	1.43826	0.524326
Tlr3	t.test	0.0515379	0.150755	6.31305	5.97499	1.42318	0.509122
Pax5	t.test	0.0519574	0.151174	4.86643	4.20085	1.6017	0.679605
Gp1bb	t.test	0.0535837	0.155081	6.96944	5.95768	1.85156	0.88874
Lilra6	t.test	0.0553076	0.157159	4.38489	3.57652	1.43551	0.521564
H2.DMa	t.test	0.0546767	0.157159	7.64902	8.22275	0.743334	-0.427917
Gpr44	t.test	0.0554511	0.157159	3.78527	3.22959	1.37881	0.463423
Ccrl2	t.test	0.0550372	0.157159	4.89655	4.03122	1.70473	0.769547
Il10	t.test	0.0565124	0.158502	3.20885	2.03562	1.80345	0.850759
Ikbkg	t.test	0.0565031	0.158502	6.45829	6.27426	1.17869	0.23718
Ctla4	t.test	0.0567943	0.158502	3.9387	4.31759	0.580622	-0.784328
C8a	t.test	0.0575407	0.15977	3.32318	2.79909	1.4195	0.505384
Il6st	t.test	0.0581274	0.159777	9.77811	9.42608	1.31819	0.398563
Foxp3	t.test	0.0578649	0.159777	4.17126	4.73281	0.710222	-0.493658
Itga4	t.test	0.0617915	0.169	9.11802	8.50359	1.65616	0.727842
Tlr1	t.test	0.0629537	0.171322	6.33381	5.68342	1.50243	0.587298
Tapbp	t.test	0.0640466	0.172579	8.26267	8.42907	0.837136	-0.256466
Il21	t.test	0.0638202	0.172579	3.54408	3.0321	1.47387	0.559608
Ccl3	t.test	0.0661083	0.177261	5.95598	5.39403	1.56745	0.64842
Bst1	t.test	0.0665311	0.177524	5.29862	5.54782	0.758301	-0.399158
Cxcl3	t.test	0.070186	0.186368	3.38795	4.31397	0.644511	-0.633724
Lcp2	t.test	0.0730442	0.19302	7.55253	7.21762	1.35864	0.442165
Jak2	t.test	0.0763397	0.199798	8.83616	8.56071	1.29771	0.375966
Entpd1	t.test	0.0761872	0.199798	7.13388	7.44444	0.79387	-0.333026
C4bp	t.test	0.0800233	0.208442	3.54823	3.12267	1.58157	0.661355
Ptgs2	t.test	0.0820911	0.212814	4.06174	4.70764	0.599312	-0.73862
Pdcd1lg2	t.test	0.0867707	0.223885	3.41642	4.31107	0.620134	-0.689348
Eomes	t.test	0.0874689	0.224627	4.52632	3.85997	1.50838	0.592999
Cx3cl1	t.test	0.0915282	0.233953	6.18562	5.90689	1.34239	0.424807
S100a8	wilcox.test	0.0938617	0.238798	10.768	14.0674	0.238529	-2.06777
Il9	t.test	0.0942969	0.238798	4.40254	3.99186	1.46249	0.548426
C1qa	t.test	0.0951161	0.239763	10.2342	9.84235	1.28828	0.365449
Tap1	t.test	0.0984552	0.241576	8.00704	8.32197	0.773	-0.37146
Nox4	t.test	0.0983468	0.241576	5.88443	5.44095	1.28329	0.359843
Klra7	t.test	0.0985626	0.241576	3.46739	2.96901	1.52548	0.609264
Cfd	t.test	0.0993686	0.241576	8.38774	10.4027	0.403796	-1.3083
Cd79b	t.test	0.0970271	0.241576	5.03261	4.2891	1.35503	0.438329
Cd53	t.test	0.0968876	0.241576	4.52834	4.31107	1.35222	0.435333
Ccl11	t.test	0.0974721	0.241576	10.8945	9.94661	1.86047	0.895668
Bst2	t.test	0.0991988	0.241576	8.77318	8.6418	1.21507	0.28104
Il2rg	t.test	0.100343	0.242865	6.12805	6.19849	0.787881	-0.34395
Csf1r	t.test	0.101397	0.244335	9.65609	9.41395	1.21335	0.27899
Tlr4	t.test	0.10337	0.247997	7.50577	7.15472	1.20356	0.26731
Klra21	t.test	0.106202	0.25368	3.11914	1.99277	1.94176	0.957365
Tnfrsf1b	t.test	0.116672	0.277477	7.49873	7.19219	1.32553	0.406565
Fcgrt	t.test	0.117998	0.279415	9.11948	8.74052	1.26313	0.337004
Ptafr	wilcox.test	0.120591	0.279504	7.50118	7.34492	1.10261	0.140922
Prf1	wilcox.test	0.120591	0.279504	3.14496	3.57652	0.582342	-0.780062
Mbp	wilcox.test	0.120591	0.279504	5.71338	5.20006	1.19832	0.261011
Irf1	wilcox.test	0.120591	0.279504	8.51045	8.31039	1.17987	0.238631
Il17b	wilcox.test	0.120591	0.279504	3.88117	3.45154	1.21299	0.278572
Mapk14	t.test	0.122376	0.281258	8.79104	8.60333	1.14876	0.200072
Ctss	t.test	0.121949	0.281258	9.80398	9.95935	0.735458	-0.443285
Il21r	t.test	0.1237	0.283113	3.54397	3.16189	1.73963	0.798781
Cd244	t.test	0.126044	0.287276	5.34335	5.4614	0.743528	-0.427541
Hc	t.test	0.12747	0.288125	4.13202	3.79909	1.33796	0.420034
Fcgr2b	t.test	0.127204	0.288125	10.9694	10.0345	1.57818	0.658258
Ltf	t.test	0.129121	0.288282	4.24063	3.85997	1.36956	0.453711
Cd163	t.test	0.128841	0.288282	6.88255	7.68391	0.682522	-0.551053
Atm	t.test	0.128213	0.288282	5.61645	5.37886	1.15478	0.207614
Cd160	t.test	0.131061	0.291424	3.41162	3.15543	1.29343	0.371198
Klrk1	t.test	0.136797	0.302947	5.19908	5.59634	0.770115	-0.376855
Traf1	t.test	0.138382	0.304019	4.46979	4.74739	0.825996	-0.275793
Pigr	t.test	0.138393	0.304019	3.68494	3.31325	1.36944	0.45359
Gm10499	t.test	0.141103	0.308733	6.17953	6.98607	0.75381	-0.407727
Nod2	t.test	0.144483	0.31487	4.3904	4.73281	0.746853	-0.421104
Tnfsf14	t.test	0.146333	0.317635	5.01658	4.79961	1.30438	0.383366
Tbx21	t.test	0.151895	0.32098	3.50664	2.31325	1.52917	0.612745
Socs3	t.test	0.149513	0.32098	7.00742	6.65306	1.23009	0.298767
Ms4a1	t.test	0.150925	0.32098	3.73443	3.39917	1.24837	0.320044
Mapk1	t.test	0.148598	0.32098	9.59509	9.65721	0.957778	-0.0622375
Irak4	t.test	0.15173	0.32098	8.16369	7.95826	1.19184	0.253191
H60a	t.test	0.151469	0.32098	3.57753	3.27501	1.18022	0.239062
Gfi1	wilcox.test	0.151981	0.32098	3.09161	2.03562	1.46763	0.553487
Vcam1	t.test	0.154185	0.324382	5.65508	5.4121	1.45598	0.54199
Ifng	t.test	0.157299	0.328708	3.12919	2.53854	1.45071	0.53676
Cd86	t.test	0.157443	0.328708	5.8916	5.97888	0.844594	-0.24367
Pou2f2	t.test	0.158812	0.330304	5.23566	4.54782	1.28393	0.360566
Rela	t.test	0.160369	0.332281	8.35013	8.15315	1.19645	0.258757
Cybb	t.test	0.164205	0.338944	7.56267	7.18448	1.36069	0.444335
Fas	t.test	0.165847	0.341046	5.05486	4.96947	1.18643	0.246625
Icosl	t.test	0.167802	0.343774	7.41426	7.16641	1.19681	0.259196
Nox1	t.test	0.169999	0.344405	3.66175	3.47768	1.29922	0.377641
Frmpd4	t.test	0.169296	0.344405	3.41162	2.22342	1.58515	0.664617
Cd97	t.test	0.169852	0.344405	8.9572	8.63575	1.29672	0.374864
Xcl1	t.test	0.173291	0.34894	5.07425	5.44095	0.783093	-0.352744
Psmb10	t.test	0.173513	0.34894	6.15774	6.0376	1.20172	0.2651
Il28a	t.test	0.17432	0.349279	4.25291	3.76022	1.32701	0.408178
Rorc	t.test	0.176569	0.349939	5.84969	6.02037	0.645376	-0.631788
Ifi204	t.test	0.17627	0.349939	6.45065	6.15462	1.20195	0.265383
Crlf2	t.test	0.17586	0.349939	7.57539	7.23515	1.29297	0.37069
Cxcr3	t.test	0.178258	0.352011	5.67879	5.36212	1.20996	0.274957
Gzma	t.test	0.179287	0.352769	4.99789	4.54597	1.29345	0.371224
Il15ra	t.test	0.182231	0.357277	5.03087	5.16189	0.798767	-0.324154
Kit	t.test	0.182955	0.357416	4.40744	4.20085	1.41394	0.499725
Tlr5	t.test	0.188802	0.36328	5.27284	5.07938	1.20606	0.270301
Ppbp	wilcox.test	0.189277	0.36328	3.55887	2.5509	1.45438	0.540409
Pdgfrb	t.test	0.188038	0.36328	7.93712	7.24726	1.44082	0.526891
Icam2	t.test	0.187507	0.36328	5.80631	5.68342	1.18544	0.245423
Fcgr4	wilcox.test	0.189277	0.36328	5.45825	5.26828	1.13926	0.188103
Ptpn2	t.test	0.191918	0.36578	7.48774	7.22978	1.20851	0.273232
C3	t.test	0.191774	0.36578	6.909	7.90479	0.682336	-0.551445
S100a9	t.test	0.194499	0.369414	9.88998	12.8026	0.235436	-2.0866
Ccr9	t.test	0.198753	0.376187	3.98685	4.27426	0.821748	-0.283232
C8b	t.test	0.204896	0.386477	4.36107	3.89918	1.25875	0.331989
Il1b	t.test	0.207101	0.38796	4.58354	5.31034	0.630756	-0.664847
Gpr183	t.test	0.207081	0.38796	5.13403	5.16189	0.816427	-0.292604
Ptpn6	t.test	0.211939	0.395668	7.93023	7.68734	1.13312	0.180298
Ceacam1	t.test	0.215073	0.400153	6.45697	6.27724	1.3773	0.461844
Sell	t.test	0.217166	0.400313	5.65876	5.59962	1.37793	0.462499
Il20	t.test	0.217159	0.400313	3.96942	3.96993	1.3485	0.431356
Cd19	t.test	0.217355	0.400313	4.02518	3.73227	1.27793	0.353803
Cxcr4	t.test	0.225805	0.413471	6.55482	6.73281	0.864844	-0.209488
Ahr	t.test	0.226011	0.413471	8.72727	8.89806	0.864287	-0.210417
Lilra5	t.test	0.228706	0.417007	4.9812	4.62234	1.24205	0.312723
Tlr9	t.test	0.22994	0.417864	5.26716	5.23993	1.17468	0.232264
Irf4	wilcox.test	0.231857	0.418567	5.4043	5.03782	1.10561	0.144842
Ccl5	wilcox.test	0.231857	0.418567	4.86642	5.13093	0.707432	-0.499336
Il12a	t.test	0.23325	0.418802	4.94538	4.63575	1.24729	0.318803
Ccr6	t.test	0.233519	0.418802	3.46385	3.77716	0.756415	-0.402751
Fcgr1	t.test	0.235796	0.421504	6.47586	6.13278	1.28934	0.366634
Stat5a	t.test	0.237879	0.423843	7.78024	7.53356	1.12172	0.165709
Stat4	t.test	0.244788	0.429058	3.93013	4.07895	1.18473	0.244554
Notch2	t.test	0.243903	0.429058	8.17314	8.30136	0.882295	-0.180667
Il13	t.test	0.244589	0.429058	5.28251	5.10476	1.24755	0.319093
Clec4a4	t.test	0.245512	0.429058	2.93445	2.64616	1.3492	0.432108
Cd5	t.test	0.242284	0.429058	4.93957	5.06264	0.87152	-0.198395
Casp8	t.test	0.244352	0.429058	7.73266	7.49705	1.14564	0.196148
Il15	t.test	0.248059	0.430756	5.0094	4.61648	1.23145	0.300354
Cxcl12	t.test	0.247485	0.430756	9.56165	9.61532	1.22003	0.286916
Ccbp2	t.test	0.250214	0.433123	3.98016	4.40054	0.843857	-0.24493
Casp1	t.test	0.254726	0.439544	7.36888	7.64342	0.851871	-0.231293
Cfi	t.test	0.256217	0.440726	3.17974	2.81558	1.46814	0.553994
Itln1	t.test	0.258298	0.442913	3.86807	3.65306	1.3405	0.422772
Tslp	t.test	0.260026	0.443866	4.80025	4.99684	0.649624	-0.622323
Marco	t.test	0.260584	0.443866	3.28283	3.96255	0.7485	-0.417926
Ccr10	t.test	0.261289	0.443866	4.64298	4.34483	1.25872	0.33196
Ctsc	t.test	0.265478	0.448512	8.83578	9.07144	0.911383	-0.133871
Ccl12	t.test	0.265664	0.448512	6.78445	6.78555	1.38228	0.467052
Ikzf1	t.test	0.27179	0.456837	5.11624	4.63575	1.16471	0.219976
Ccl4	t.test	0.272265	0.456837	3.58653	3.39369	1.27703	0.352792
Bid	t.test	0.274463	0.459116	5.79527	5.95768	0.886497	-0.173812
Csf1	t.test	0.275777	0.459909	8.17072	8.20056	1.257	0.329984
Zbtb7b	t.test	0.281511	0.46726	7.96356	8.17817	0.877397	-0.188699
Tnfsf8	t.test	0.284193	0.46726	3.94201	3.10434	1.3544	0.437655
Msr1	t.test	0.283246	0.46726	6.02077	5.72165	1.19644	0.258748
Klra4	t.test	0.284456	0.46726	2.69519	2.81558	1.56635	0.647404
Il22	t.test	0.283984	0.46726	2.62579	2.27501	1.19793	0.260545
Ly86	t.test	0.288536	0.472542	7.65518	7.84743	1.22699	0.295124
Ccr5	t.test	0.292253	0.477202	6.62465	6.56377	1.2021	0.26556
Ptprc	t.test	0.293706	0.478146	7.81608	7.63909	1.1587	0.212505
Kir3dl1	t.test	0.303699	0.489148	3.95001	3.73227	1.1833	0.242815
Jak3	t.test	0.304703	0.489148	6.09809	5.7952	1.16682	0.222581
Ifngr2	t.test	0.302414	0.489148	8.57556	8.51396	1.1193	0.162603
Cfh	t.test	0.302635	0.489148	9.17744	8.75535	1.24455	0.31563
Cd1d1	t.test	0.304935	0.489148	6.15021	6.41346	0.883721	-0.178336
Cdh5	t.test	0.307795	0.492292	7.35638	6.97499	1.22608	0.294052
Pla2g2e	t.test	0.30871	0.492316	6.28652	6.224	1.36511	0.449015
Pla2g2a	t.test	0.315736	0.502056	2.87132	2.31325	1.34809	0.430916
Cd209g	t.test	0.31892	0.505651	7.07695	7.71781	0.80469	-0.313495
Tnfsf11	t.test	0.32281	0.510338	3.57859	3.31759	0.791475	-0.337384
Cd55	t.test	0.324733	0.511899	5.60023	6.10476	0.786833	-0.34587
Lef1	t.test	0.32952	0.517952	6.23405	5.98459	1.25702	0.330012
Bcap31	t.test	0.337504	0.528982	9.69044	9.89001	0.932006	-0.101588
Klrb1	t.test	0.346551	0.538214	3.31875	2.75916	1.41317	0.498934
Itgam	t.test	0.350316	0.538214	6.5953	6.50938	1.21744	0.283851
Il11ra1	t.test	0.351266	0.538214	6.01771	5.84449	1.11961	0.162998
Ikzf2	t.test	0.351019	0.538214	6.73512	7.11936	0.882679	-0.180039
Ikbke	t.test	0.349132	0.538214	6.5341	6.01413	1.19577	0.257934
Ifitm1	t.test	0.35045	0.538214	7.62838	8.05317	0.820838	-0.284831
Cxcl10	t.test	0.345664	0.538214	5.5186	5.80245	0.791998	-0.336432
C6	t.test	0.348746	0.538214	5.17842	5.55213	0.821897	-0.28297
Sh2d1a	t.test	0.355398	0.543025	3.61214	3.22342	1.18134	0.240424
Cfb	t.test	0.370911	0.565148	6.98547	6.94696	0.852438	-0.230333
Il5	t.test	0.373731	0.567864	3.77646	2.99277	1.3272	0.40839
Plau	t.test	0.380706	0.57358	8.53071	8.55846	1.10295	0.141373
Maf	t.test	0.37866	0.57358	7.2853	7.23802	1.12629	0.171576
Lta	t.test	0.382416	0.57358	4.50219	4.27426	1.16897	0.225232
Ebi3	t.test	0.382736	0.57358	5.74746	5.4614	1.12889	0.174908
Cd40lg	t.test	0.380792	0.57358	4.22703	4.06264	1.13873	0.187432
Gpi1	t.test	0.386221	0.577222	5.45841	5.08789	1.1925	0.253993
App	t.test	0.387723	0.577887	11.7339	11.6879	1.1113	0.152244
Bcl3	t.test	0.39092	0.581069	6.41323	6.31723	1.20718	0.271636
Il4ra	t.test	0.394764	0.582037	8.85899	9.30795	0.846756	-0.239983
Il12b	t.test	0.393595	0.582037	4.95559	4.70764	1.1475	0.198496
Ifnb1	t.test	0.393794	0.582037	3.17607	2.96901	1.14703	0.197905
Mapkapk2	wilcox.test	0.396892	0.582684	8.46118	8.38327	1.09414	0.129791
Il22ra2	t.test	0.397567	0.582684	4.58303	5.23036	0.799257	-0.323268
Ccl9	t.test	0.398398	0.582684	9.62308	9.31542	1.16055	0.214804
C1qb	t.test	0.400201	0.58376	10.3632	10.2408	1.14003	0.18907
Sigirr	t.test	0.409395	0.594167	4.27882	3.99186	1.18529	0.245239
Ccr2	t.test	0.409508	0.594167	8.69573	8.54647	1.1077	0.147567
Csf3r	t.test	0.411569	0.595577	5.55259	5.2891	1.1364	0.18447
Il3	t.test	0.418681	0.604271	3.48082	3.12267	1.17486	0.232488
Tal1	t.test	0.421072	0.605535	4.65398	4.58736	1.09255	0.127703
Psmd7	t.test	0.421771	0.605535	10.257	10.0872	1.06835	0.0953842
C1ra	t.test	0.431766	0.618262	8.17636	8.48607	0.870434	-0.200193
Cxcr5	t.test	0.435097	0.621405	2.84125	3.47768	0.789934	-0.340197
Masp2	t.test	0.437947	0.622548	2.52982	3.0321	0.823783	-0.279663
Ifna2	t.test	0.438174	0.622548	2.65633	1.95233	1.30451	0.383507
Ncf4	t.test	0.4458	0.631742	6.9188	6.56377	1.13856	0.187212
Klrc2	t.test	0.44721	0.632104	4.78764	4.87676	1.16035	0.214566
Klrc3	wilcox.test	0.463403	0.638493	3.17688	2.81558	1.38558	0.470486
Klra6	t.test	0.455241	0.638493	3.27575	3.15543	1.12068	0.164378
Klra5	t.test	0.458575	0.638493	2.96554	2.55582	1.18482	0.24467
Irgm1	wilcox.test	0.463403	0.638493	8.27661	7.94058	1.09626	0.132595
Fcgr3	t.test	0.458876	0.638493	6.90436	6.97499	1.18576	0.24581
Csf2rb	wilcox.test	0.463403	0.638493	6.77832	6.58782	0.979258	-0.0302392
Cd96	wilcox.test	0.463403	0.638493	3.47447	3.29131	1.14264	0.192375
Cd48	t.test	0.459635	0.638493	7.43011	7.46148	0.920801	-0.119039
Camp	wilcox.test	0.463403	0.638493	3.07085	2.79909	0.975416	-0.0359105
Btnl1	t.test	0.457351	0.638493	4.07893	4.03738	1.14863	0.199909
Lilrb3	t.test	0.466502	0.641147	6.92764	6.81532	1.13263	0.17968
Itgb2	t.test	0.469224	0.643272	7.95866	7.82528	1.07897	0.109661
Tmem173	t.test	0.476776	0.648338	6.60786	6.79922	0.909797	-0.136384
Map4k1	t.test	0.478463	0.648338	4.48151	4.24336	1.10557	0.144796
Il1r1	t.test	0.477746	0.648338	8.04483	7.90225	1.06339	0.0886648
Ifna1	t.test	0.475241	0.648338	2.97068	2.81558	1.18137	0.240456
Fcamr	t.test	0.478846	0.648338	4.59533	4.47638	1.11395	0.15568
Xbp1	t.test	0.480554	0.649044	9.85442	9.80534	0.948087	-0.0769082
Tyrobp	t.test	0.482574	0.650168	10.1316	9.93992	1.10316	0.141642
Klra8	t.test	0.487675	0.653575	4.19199	4.29131	1.16404	0.219139
Il1rl1	t.test	0.488688	0.653575	6.61697	6.5818	1.10652	0.146023
Cd22	t.test	0.486559	0.653575	4.71018	4.10518	1.22096	0.288022
Tnf	t.test	0.494488	0.657251	4.69902	4.89336	0.90508	-0.143883
Thy1	t.test	0.495041	0.657251	10.3258	10.559	0.897242	-0.156431
Tgfb1	t.test	0.493232	0.657251	9.20833	9.3403	0.892679	-0.163787
Serping1	t.test	0.505923	0.670073	10.2566	10.5974	0.8618	-0.214575
Icam4	t.test	0.508348	0.671658	4.08764	3.69265	1.13811	0.186641
Nfatc3	t.test	0.511229	0.673836	6.85615	6.93817	0.948187	-0.0767572
Emr1	t.test	0.52038	0.684249	7.17258	7.28355	1.1395	0.1884
Psmb9	t.test	0.524335	0.687796	6.82093	6.89639	0.914297	-0.129265
Prkcd	t.test	0.530283	0.692892	8.46134	8.61025	0.930092	-0.104555
Itga2b	wilcox.test	0.53582	0.692892	4.2793	3.81455	1.16445	0.219648
Icam5	wilcox.test	0.53582	0.692892	3.88524	3.41143	1.11101	0.151877
H2.Q10	wilcox.test	0.53582	0.692892	4.26673	4.40054	0.755398	-0.404691
Cd79a	t.test	0.531708	0.692892	3.63343	3.45154	1.17502	0.232683
Ccr8	wilcox.test	0.53582	0.692892	3.25674	3.6893	0.742566	-0.429408
Il17a	t.test	0.539935	0.696568	4.09966	4.36177	0.888489	-0.170574
Stat3	t.test	0.541923	0.697104	10.1019	10.337	0.918508	-0.122635
Cd34	t.test	0.5429	0.697104	9.84243	9.81043	1.1424	0.19207
Il17rb	t.test	0.545499	0.698801	4.27393	4.23955	1.09037	0.124821
Cd69	t.test	0.551602	0.704968	3.46385	3.13914	1.17088	0.227595
Tgfbi	t.test	0.565414	0.720936	12.0541	11.6648	1.15185	0.203957
Relb	t.test	0.570249	0.72541	7.25154	7.224	0.94086	-0.0879483
Myd88	t.test	0.573658	0.726803	7.2853	7.37955	0.915713	-0.127032
Ly96	t.test	0.574001	0.726803	6.40318	6.52419	0.942865	-0.0848766
Ifngr1	t.test	0.577124	0.729069	9.89022	9.82914	1.05412	0.0760381
Tnfrsf13b	t.test	0.601124	0.753043	4.65336	4.50335	1.07065	0.0984905
Klrc1	t.test	0.601609	0.753043	4.04547	4.16912	0.916944	-0.125094
Hcst	t.test	0.598311	0.753043	4.04101	3.89918	1.14592	0.196509
Cd8a	t.test	0.601553	0.753043	4.10676	4.20085	1.11568	0.157919
Cd226	t.test	0.605416	0.75528	5.32959	5.66761	0.912183	-0.132605
C2	t.test	0.606157	0.75528	7.85995	7.49081	1.1026	0.140903
Vtn	wilcox.test	0.612587	0.759831	3.91804	3.42895	1.20248	0.266017
Cd28	wilcox.test	0.612587	0.759831	4.54512	3.9241	1.20174	0.265129
Hamp	t.test	0.619287	0.766403	3.39072	2.81558	1.14234	0.191994
Nox3	t.test	0.623049	0.769317	2.54836	2.03562	1.16565	0.221139
Mbl2	t.test	0.631256	0.770808	2.67491	2.96717	0.899151	-0.153364
Lilrb4	t.test	0.629047	0.770808	8.01762	7.14282	1.15273	0.20505
Fcer1g	t.test	0.630374	0.770808	7.46821	7.55221	1.0585	0.0820204
Cxcl1	t.test	0.631301	0.770808	4.37196	4.04002	1.1767	0.234741
Cd80	t.test	0.626259	0.770808	5.05192	5.15543	1.11513	0.157209
Abcb1a	t.test	0.635159	0.77379	4.92745	4.73281	1.09206	0.127047
Plaur	t.test	0.642122	0.780535	7.04259	6.92991	0.925232	-0.112113
Ptger4	t.test	0.646637	0.78428	6.38729	6.34501	1.04718	0.0665162
Zap70	t.test	0.654805	0.789334	4.05958	4.39369	0.891941	-0.16498
Nfkbia	t.test	0.655132	0.789334	7.27813	7.23984	0.951469	-0.071772
Cd36	t.test	0.654028	0.789334	7.78209	8.46438	0.866982	-0.205926
Stat6	t.test	0.659241	0.790203	8.89561	8.91262	1.02239	0.0319427
Pdcd1	t.test	0.657572	0.790203	4.14959	3.9241	1.08748	0.120994
Nfkb1	t.test	0.660188	0.790203	8.40722	8.45381	1.04562	0.0643536
Cd4	t.test	0.663148	0.792013	5.00258	4.97865	1.07975	0.110693
Tcf7	t.test	0.675401	0.803139	7.07783	7.03573	1.05033	0.0708477
Btnl2	t.test	0.673974	0.803139	4.01982	3.87676	1.08662	0.119841
Ikzf3	t.test	0.679831	0.804909	4.37629	4.13996	1.07775	0.108022
C7	t.test	0.679044	0.804909	4.82546	4.5373	0.815241	-0.294701
Irak3	t.test	0.684647	0.80538	6.76307	6.85474	0.968125	-0.0467342
C1s	t.test	0.68406	0.80538	9.76725	9.94797	1.09247	0.127596
Btk	t.test	0.684201	0.80538	6.01876	5.73769	1.06808	0.0950204
Tnfsf10	t.test	0.688385	0.80804	4.74356	4.82782	0.943466	-0.0839579
Mr1	t.test	0.692887	0.811533	7.22863	7.28198	1.05261	0.0739743
Cd274	wilcox.test	0.694328	0.811533	5.19102	5.27463	0.967218	-0.0480867
H2.Ea.ps	t.test	0.696859	0.812755	2.76403	2.5509	1.07138	0.0994721
Klrd1	t.test	0.699714	0.814347	5.51719	5.17832	0.911455	-0.133757
Cxcl13	t.test	0.708112	0.822372	4.40525	4.31107	0.870933	-0.199366
Tigit	t.test	0.713896	0.825657	3.58623	3.61471	0.903234	-0.146828
Batf	t.test	0.713959	0.825657	5.01318	5.0027	0.942874	-0.084863
Cd27	t.test	0.716125	0.826415	4.25577	4.20085	1.05181	0.0728701
Il17ra	t.test	0.718437	0.827337	6.39498	6.52419	0.959589	-0.059511
Hlx	t.test	0.720075	0.827481	6.61175	6.38974	1.07004	0.0976624
Slamf1	t.test	0.729938	0.835306	3.64029	3.5373	1.0914	0.126181
Cd14	t.test	0.729831	0.835306	6.38472	6.36492	1.04378	0.0618202
Tnfsf15	t.test	0.74303	0.844984	3.61873	3.69265	0.94548	-0.0808814
Il23r	t.test	0.742714	0.844984	3.76624	3.85599	1.05372	0.075493
Folr4	t.test	0.741687	0.844984	3.33698	3.41143	0.927929	-0.107914
Cd247	t.test	0.746453	0.847116	5.7675	5.96301	0.960783	-0.0577178
Tnfrsf9	t.test	0.750631	0.850094	2.84689	2.6893	1.05608	0.078725
Cxcr1	t.test	0.753214	0.850595	3.07911	3.16189	0.942459	-0.0854975
Aicda	t.test	0.754183	0.850595	3.05273	2.5509	1.08646	0.11963
Nfkb2	t.test	0.758118	0.853273	8.15689	8.1572	0.963676	-0.0533795
Il17f	t.test	0.763106	0.855367	3.4215	3.45154	0.942746	-0.0850594
Gzmb	t.test	0.762768	0.855367	3.41162	3.32481	1.07419	0.103251
Sele	t.test	0.767215	0.857911	4.15261	3.81558	0.942785	-0.0849992
Il18rap	t.test	0.768975	0.857911	4.71512	4.50335	0.954219	-0.0676079
Clec5a	t.test	0.770081	0.857911	5.15873	5.08789	1.06052	0.084775
Il23a	wilcox.test	0.77214	0.858456	3.33168	3.22959	0.839768	-0.251937
Stat1	wilcox.test	0.778866	0.860686	7.87517	7.94058	1.02217	0.03164
Psmb11	wilcox.test	0.778866	0.860686	3.61651	3.67016	0.975637	-0.0355831
Il12rb1	wilcox.test	0.778866	0.860686	4.32471	4.12267	1.00931	0.0133684
Litaf	t.test	0.789111	0.870249	8.59159	8.49426	1.03975	0.0562433
Itgax	t.test	0.791035	0.870616	7.07765	7.05637	1.05541	0.0778045
Tnfsf13b	t.test	0.794242	0.872391	3.8453	3.87381	1.03641	0.0515978
Tlr8	t.test	0.804575	0.881969	6.39436	6.25644	1.03229	0.0458528
Itga6	t.test	0.806723	0.882555	10.2841	10.3472	0.979979	-0.0291778
Tnfrsf8	t.test	0.810219	0.88461	3.43625	3.32481	0.945798	-0.0803957
Il6	t.test	0.818104	0.889668	5.07796	5.31759	0.94739	-0.0779696
Ikzf4	t.test	0.81658	0.889668	5.06436	4.90689	1.0323	0.0458597
Fcer1a	t.test	0.827225	0.897802	5.49994	5.48382	1.0493	0.0694335
Xcr1	t.test	0.833661	0.902995	3.58528	3.79909	0.963446	-0.0537246
Cxcl9	t.test	0.83946	0.907479	5.79349	5.35896	1.0646	0.0903067
Irf7	t.test	0.860167	0.926264	4.98462	4.8679	1.04191	0.0592357
Cd6	t.test	0.860224	0.926264	3.80571	4.07895	0.969445	-0.0447686
Cxcl15	t.test	0.863121	0.927558	3.16721	2.81558	1.04777	0.067317
Nfil3	t.test	0.868543	0.928484	7.34365	7.27724	1.01881	0.0268823
Irak2	wilcox.test	0.866511	0.928484	6.90392	6.81481	1.03802	0.0538381
Ccl7	t.test	0.869074	0.928484	6.268	6.08831	1.03416	0.0484531
Irf8	t.test	0.87869	0.936927	5.84329	5.92979	1.01846	0.0263829
Kir3dl2	t.test	0.883949	0.9407	3.36852	3.16189	1.03409	0.0483685
Hfe	t.test	0.89066	0.946002	7.68863	7.49953	1.02276	0.0324706
Itgal	t.test	0.894258	0.947983	5.31753	5.4446	0.975442	-0.0358716
Ccl6	t.test	0.898797	0.950951	7.34068	7.52184	1.02892	0.0411265
Ptpn22	t.test	0.903385	0.953961	5.41352	5.50335	0.978716	-0.0310372
Il4	t.test	0.905611	0.954469	3.5109	3.85997	0.969852	-0.044164
Fkbp5	t.test	0.918883	0.963717	6.78961	6.82769	1.01163	0.0166835
Dpp4	t.test	0.917467	0.963717	6.63132	6.7075	0.979384	-0.0300541
Cr2	t.test	0.919671	0.963717	3.14485	2.96717	1.02879	0.0409523
Il27	t.test	0.922879	0.96523	3.45389	3.16189	0.978132	-0.0318988
Trem1	t.test	0.954276	0.96747	3.47176	3.45286	1.01702	0.0243506
Tnfrsf17	wilcox.test	0.955089	0.96747	3.91215	3.99186	0.973589	-0.0386155
Pecam1	wilcox.test	0.955089	0.96747	8.32314	8.56932	1.0651	0.0909877
Nt5e	t.test	0.950788	0.96747	7.67538	7.80252	1.00547	0.00786707
Il7	t.test	0.940025	0.96747	4.20657	4.16912	1.01508	0.0216
Il2	wilcox.test	0.953816	0.96747	3.28244	3.45154	0.930028	-0.104653
Ifih1	wilcox.test	0.955089	0.96747	7.24973	7.28198	0.957993	-0.0619137
Fasl	wilcox.test	0.955089	0.96747	3.59456	3.39369	1.14727	0.198205
Ctsg	t.test	0.946944	0.96747	3.38795	3.39369	0.982807	-0.0250204
Cmklr1	t.test	0.953223	0.96747	8.14547	8.03072	1.00605	0.00870028
Cfp	wilcox.test	0.955089	0.96747	8.11995	7.90346	0.952646	-0.0699873
Cd83	t.test	0.939726	0.96747	6.81061	6.63575	1.01215	0.017417
Cd40	t.test	0.935674	0.96747	5.28481	5.27463	1.01083	0.015543
Cd3eap	t.test	0.945235	0.96747	6.84993	6.74752	0.993144	-0.00992454
Ccl26	t.test	0.95492	0.96747	2.80927	2.57773	0.988497	-0.0166921
Card9	wilcox.test	0.955089	0.96747	5.48219	5.52795	1.08646	0.119633
C9	wilcox.test	0.955089	0.96747	3.19345	2.99277	1.06943	0.0968381
H2.Ob	t.test	0.957981	0.968606	5.22877	5.20046	0.990486	-0.0137916
Ccl24	t.test	0.963687	0.972577	6.09964	5.77847	1.00981	0.0140891
Cdkn1a	t.test	0.970559	0.977708	10.3772	10.3088	0.996891	-0.00449228
Pdcd2	t.test	0.989719	0.995177	5.86307	5.87652	0.998478	-0.00219748
Irf5	t.test	0.994604	0.996426	7.38029	7.56171	1.00081	0.00116529
Clec4e	t.test	0.993082	0.996426	3.71018	3.6837	0.99759	-0.00348107
Aire	wilcox.test	1	1	3.96287	3.95233	1.05656	0.0793751
